# Supplementary material
Source: Elsevier journal article supplement (https://www.sciencedirect.com/science/article/pii/S217420492100283X)
Supplement: mmc1 [file S217420492100283X:mmc1.doc]

**Suplemento**

**Tabela Suplementar 1**. Lista de vídeos de acordo com o termo pesquisado e respectivos ranking no YouTube e motivo para exclusão.

| **Termo pesquisado** | **Ranking no YouTube** | **Título vídeo** | **URL** | **Motivo de exclusão** |
| --- | --- | --- | --- | --- |
| “ataque + cardíaco” | 1 | 6 Sinais de Ataque Cardíaco que podem salvar sua vida! | https://www.youtube.com/watch?v=wG8VNRM2qYI | - |
| 2 | Síntomas y Señales Tempranas de Infarto, Paro ó Ataque Cardiaco de los que puede depender tu Vida | https://www.youtube.com/watch?v=bynfeUI588U | Língua espanhola |
| 3 | Como reconhecer um ataque cardíaco um mês antes que aconteça | https://www.youtube.com/watch?v=U8geVcjicRM | - |
| 4 | 15 Alimentos Que Diminuem o Risco de Ataque Cardíaco | https://www.youtube.com/watch?v=mJ01ifKTiZI | - |
| 5 | TU CUERPO AVISA 28 DÍAS ANTES DE UN ATAQUE AL CORAZÓN, TE MOSTRAMOS LAS SEÑALES OCULTAS QUE TODOS DE | https://www.youtube.com/watch?v=jyQ6nhWWaRw | Língua espanhola |
| 6 | Doctor TV-Sepa cómo actuar ante un paro cardiaco- 14/08/13 | https://www.youtube.com/watch?v=aLpXrvFxBC4 | Língua espanhola |
| 7 | Leão picado por uma mamba negra sofre um ataque cardíaco | https://www.youtube.com/watch?v=9R2IF5uWeuQ | Vídeo irrelevante e língua inglesa |
| 8 | Diferença Entre um Ataque Cardíaco e uma Crise de Pânico! | Dicas de Saúde | https://www.youtube.com/watch?v=P_MD8mTGIkE | - |
| 9 | 4 sintomas que você pode sentir antes de ter um ATAQUE CARDÍACO! | https://www.youtube.com/watch?v=a4AusuMxc1k | - |
| 10 | 6 Síntomas de un paro cardíaco que solo se dan en mujeres | https://www.youtube.com/watch?v=jUuY9JyyFHc | Língua espanhola |
| 11 | Jugador del Ajax, Abdelhak Nouri sufre ataque cardíaco en partido amistoso | https://www.youtube.com/watch?v=iOP3AAVM8gE | Vídeo irrelevante e língua espanhola |
| 12 | Homem abandonado em alto mar teria morrido de ataque cardíaco | https://www.youtube.com/watch?v=T7ocaCoqWsA | - |
| 13 | ATAQUE CARDÍACO | Nerdcast Stories | https://www.youtube.com/watch?v=ZVDHzV35V-8 | Vídeo irrelevante |
| 14 | Infarto (ataque cardíaco) | Dr. Drauzio Varella | https://www.youtube.com/watch?v=sEY_kS4fb-g | - |
| 15 | Infarto Agudo do Miocardio - Parte 1 | https://www.youtube.com/watch?v=zFlahOXu3Lk | - |
| 16 | Ataque cardíaco - Educação Física UFSM | https://www.youtube.com/watch?v=Nrk4O2beJ2k | Vídeo irrelevante |
| 17 | Incrível Coração em pleno ataque cardíaco | https://www.youtube.com/watch?v=XME0z21dWbw | Vídeo irrelevante |
| 18 | 4 señales que avisan de padecer ataque al corazon | https://www.youtube.com/watch?v=ALDogdkqd-U | Língua espanhola |
| 19 | Por qué ocurre el ataque cardíaco ó infarto al miocardio | https://www.youtube.com/watch?v=U92H5mXYK1E | Língua espanhola |
| 20 | Infarto saiba como prevenir um ataque cardíaco | https://www.youtube.com/watch?v=3oi5AQzrzHM | - |
| 21 | ¡Adriano sufre un ataque cardiaco! | Por Ella Soy Eva - Televisa | https://www.youtube.com/watch?v=75ByVAwH5jA | Vídeo irrelevante e língua espanhola |
| 22 | motorista de ônibus tem ataque cardíaco e morre ao volante | https://www.youtube.com/watch?v=qJr8tJun7zg | - |
| 23 | Ataque Cardíaco | https://www.youtube.com/watch?v=rKzV5hO-5Ps | Vídeo irrelevante e língua espanhola |
| 24 | INCLÍVEL - Médico turco sofre ataque cardíaco ao vivo durante programa de TV vídeo | https://www.youtube.com/watch?v=oBRSJlJF2GY | Vídeo irrelevante e língua turca |
| 25 | Você Sabia que Parada Cardíaca e Ataque Cardíaco não são a mesma coisa? Saiba como se prevenir. | https://www.youtube.com/watch?v=sxC2PqU-qkI | - |
| 26 | Ataque Cardíaco Devido a Aterosclerose | https://www.youtube.com/watch?v=5qG-K546AJM | Vídeo duplicado |
| 27 | ATAQUE CARDÍACO.3g2 | https://www.youtube.com/watch?v=89mCfgx3XKw | Língua espanhola |
| 28 | 10 Sinais Alarmantes De Que O Seu Coração Não Está Funcionando Direito | https://www.youtube.com/watch?v=cp172xNnRhk | - |
| 29 | Como Diferenciar um Ataque Cardíaco de uma Crise de Pânico | Dicas de Saúde | https://www.youtube.com/watch?v=kzkSaqgZWV4 | - |
| 30 | COMO ACONTECE UM INFARTO (ATAQUE CARDÍACO) - Dr. Marcelo Lima | https://www.youtube.com/watch?v=gYY-T8qnaXI | - |
| 31 | MI PRIMER ATAQUE CARDIACO EN REALIDAD VIRTUAL !! | https://www.youtube.com/watch?v=3pwq9EXLHvE | Língua espanhola |
| 32 | infarto do miocárdio como ocorre? Entenda o ataque cardíaco | https://www.youtube.com/watch?v=kqGVXAKOEF4 | - |
| 33 | SEGURANÇAS DO METRÔ-SP SOCORRE VÍTIMA DE ATAQUE CARDÍACO | https://www.youtube.com/watch?v=maIeOapRa2o | Vídeo irrelevante |
| 34 | EU BLUEZAO ESTOU COM SINTOMAS DE QUEM VAI TER UM ATAQUE CARDIACO | https://www.youtube.com/watch?v=i4VuEwVseRo | Vídeo irrelevante |
| 35 | Doctor TV-Sepa cómo actuar ante un paro cardiaco- 14/08/13 | https://www.youtube.com/watch?v=aLpXrvFxBC4 | Língua espanhola |
| 36 | INFARTO AGUDO DO MIOCÁRDIO - Ataque Cardíaco - Causas - Parte 2 - Dr. Júlio Caleiro | https://www.youtube.com/watch?v=lxp08dmK0P8 | - |
| 37 | Primeiros Socorros - Ataque Cardíaco | https://www.youtube.com/watch?v=XazN9amqzpA | - |
| 38 | Ladrão sofre ataque cardíaco fulminante enquanto roubava | https://www.youtube.com/watch?v=CNOi0n93dpc | Vídeo irrelevante |
| 39 | Ataque Fulminante | https://www.youtube.com/watch?v=5Iifgi9abYM | Vídeo irrelevante |
| 40 | Ataque cardiaco fulminante | https://www.youtube.com/watch?v=-dp24-16X-A | Vídeo irrelevante |
| 41 | Grand Theft Auto 5►Ataque Cardiaco | https://www.youtube.com/watch?v=c8sPpjI3vWU | Vídeo irrelevante |
| 42 | CRISTO ESTA VOLTANDO - O ÓDIO DA BESTA CONTRA A PROSTITUTA | https://www.youtube.com/watch?v=feneNly5Tw8 | Vídeo irrelevante |
| 43 | ATAQUES CARDÍACOS SILENCIOSOS | https://www.youtube.com/watch?v=OHfGSvp0vIA | - |
| 44 | ataque fulminante | https://www.youtube.com/watch?v=r4AvKsy5dms | Vídeo irrelevante |
| 45 | Sintomas de Ataque Cardíaco e como tratar! | https://www.youtube.com/watch?v=X3vikAJwwQg | - |
| 46 | Ataque Cardíaco Animado | https://www.youtube.com/watch?v=vCGBGquXmD0 | Vídeo irrelevante |
| 47 | Um mês antes de um ataque cardíaco, seu corpo vai avisar você com estes 9 sinais! | https://www.youtube.com/watch?v=oOKygxmAGmk | - |
| 48 | Homem sofre ataque cardíaco e morre enquanto dançava | https://www.youtube.com/watch?v=GDABRGE4mbg | Vídeo irrelevante |
| 49 | ATAQUE CARDÍACO EDITADO!!! - Ataque da Casa | https://www.youtube.com/watch?v=Ppsrd9QiEyg | Vídeo irrelevante |
| 50 | ELES NÃO QUEREM QUE VOCE SAIBA: LIVRE-SE DO ATAQUE CARDIACO e DERRAME ! | https://www.youtube.com/watch?v=8PQS98zErkw | Vídeo irrelevante |
| 51 | Câmera registra momento em que mulher sofre ataque cardíaco durante exercício em academia | https://www.youtube.com/watch?v=AARE7lUVkzk | Vídeo irrelevante |
| 52 | Como salvar a vida de alguém com ATAQUE CARDÍACO | Dr Lucas Fustinoni - Médico - CRMPR 30155 | https://www.youtube.com/watch?v=bFniudEbJOQ | - |
| 53 | Quase tendo um ataque cardíaco! | Melhores Momentos PUBG #339 | https://www.youtube.com/watch?v=AFiTaJBJ2sI | Vídeo irrelevante |
| 54 | 🔥Nunca Faça 👀 Será que o ATAQUE CARDÍACO está relacionado a ÁGUA ? | https://www.youtube.com/watch?v=3p_CfdhF_Go | Vídeo irrelevante |
| 55 | Ataque... Cardíaco! | Rimworld 1.0 # - Gameplay Português PT-BR | https://www.youtube.com/watch?v=TfSwm5uMI_U | Vídeo irrelevante |
| 56 | Vendedor de carros tem ataque cardiaco em test Drive - Camara Oculta | https://www.youtube.com/watch?v=DZj_4D7RT_g | Vídeo irrelevante e língua inglesa |
| 57 | FIQUE ATENTO👀 Sabia Que O ATAQUE CARDÍACO E A Água Estão Relacionados? | https://www.youtube.com/watch?v=dHQBGec7dO8 | - |
| 58 | Mulher sofre ataque cardíaco durante exercício em academia | https://www.youtube.com/watch?v=yZAkwbnXzXk | Vídeo irrelevante e língua inglesa |
| 59 | O CASO DO MINI ATAQUE CARDÍACO | https://www.youtube.com/watch?v=zxdskfIaifQ | Vídeo irrelevante |
| 60 | PIUZINHO QUASE MORRE COM ATAQUE CARDÍACO | https://www.youtube.com/watch?v=6BNd_iqyFAo | Vídeo irrelevante |
| 61 | Homem sofre ataque cardíaco fulminante enquanto pilotava sua moto na capital | https://www.youtube.com/watch?v=rgtOrb_0m4Y | Vídeo irrelevante |
| 62 | INCRÍVEL, pai sofre ataque cardíaco na frente da filha | https://www.youtube.com/watch?v=t693NFcCt_I | Vídeo irrelevante e língua inglesa |
| 63 | Que hacer en un ataque cardiaco? | https://www.youtube.com/watch?v=g5qOpEL-2IM | Língua espanhola |
| 64 | Infarto (ataque cardíaco) | Dicas de Saúde | https://www.youtube.com/watch?v=sEY_kS4fb-g | Vídeo duplicado |
| 65 | Ataque cardíaco em 3D | https://www.youtube.com/watch?v=_KcOPnKDprw | Língua inglesa |
| 66 | Primeiros socorros: o que fazer em casos de ataque cardíaco | https://www.youtube.com/watch?v=HcvJ69Gydeg | Vídeo irrelevante |
| 67 | Câmeras segurança registra momento em que jovem ofre ataque cardíaco durante exercício em academia | https://www.youtube.com/watch?v=3GtqcIRCkuk | Vídeo irrelevante |
| 68 | Qual a diferença entre infarto e ataque cardíaco? | https://www.youtube.com/watch?v=eGJnEpEhBT8 | Vídeo duplicado |
| 69 | 7 Sintomas De Ataque Cardíaco Silencioso Que As Mulheres Podem Estar Ignorando | https://www.youtube.com/watch?v=AREwwcJiijU | - |
| 70 | MEU MÉDICO ME ALERTOU - 6 sinais de ataque cardiaco 1 mes antes de acontecer | https://www.youtube.com/watch?v=QpTco2RBNZE | - |
| 71 | Nunca lo hagas 👀¿Sabías que el ATAQUE CARDÍACO está relacionado al Agua? | https://www.youtube.com/watch?v=f7gDTFDP5IQ | Língua espanhola |
| 72 | 12 SINAIS DE QUE VOCÊ PODE TER UM ATAQUE CARDÍACO EM BREVE | https://www.youtube.com/watch?v=lYwReiPvT7I | - |
| 73 | ANSIEDADE: TENHO DOR NO PEITO. VOU TER UM ATAQUE CARDÍACO? | https://www.youtube.com/watch?v=rjFAoAUM8Uc | Vídeo irrelevante |
| 74 | Cantor FAMOSO cancela evento ao saber do fim da irmã ‘ataque cardíaco aos 18 anos | https://www.youtube.com/watch?v=f8trM1n0n9Q | Vídeo irrelevante |
| 75 | Qual a diferença entre infarto e ataque cardíaco? | https://www.youtube.com/watch?v=eGJnEpEhBT8 | - |
| 76 | Um mês antes de um ataque cardíaco, seu corpo vai avisar você; aqui estão os 6 sinais! | https://www.youtube.com/watch?v=mdM4j3ZhbK0 | - |
| 77 | Ataque Cardíaco 30 Dias Antes de Acontecer Conheçam 5 Sintomas A Obstruções Das Artérias Do Coração. | https://www.youtube.com/watch?v=9SUSPItIdV0 | - |
| 78 | Ataque Cardíaco - Sinais um mês Antes | https://www.youtube.com/watch?v=7QYnVN9dq3E | - |
| 79 | Ataque Cardíaco em gestante/ Sistema Holter | https://www.youtube.com/watch?v=t5zSHdy2XTw | Vídeo irrelevante |
| 80 | Ataque Cardíaco ou Ataque de Ansiedade?! | https://www.youtube.com/watch?v=q67bEIIoFO0 | - |
| 81 | Primeiros Socorros Para Ataque Cardíaco | https://www.youtube.com/watch?v=QKeA8oqw1i8 | - |
| 82 | Sintomas de Ataque Cardíaco e Tratamento! | https://www.youtube.com/watch?v=WcD5AIg_dvM | - |
| 83 | EXCLUSIVO! Carlos Alberto fala pela primeira do ataque cardíaco que sofreu seu filho | https://www.youtube.com/watch?v=R-Nzq-L7H-8 | Vídeo irrelevante |
| 84 | Com Estes 5 Hábitos, Você Pode Reduzir o Risco de Ataque Cardíaco Em 80% I Dicas de Saúde | https://www.youtube.com/watch?v=gic7hasXUO0 | - |
| 85 | Iker Casillas sofre ataque cardíaco! | https://www.youtube.com/watch?v=ohI_V-rs-E4 | Vídeo irrelevante e sem audio |
| 86 | Murtaugh tem ataque cardíaco (DUBLADO) | https://www.youtube.com/watch?v=-011NK9X7Rw | Vídeo irrelevante |
| 87 | Ataque cardíaco: quais os sinais e o que fazer quando estiver sozinho? | https://www.youtube.com/watch?v=VPakaYscvG8 | - |
| 88 | TROLEI A MINHA MÃE FINGINDO QUE ESTAVA TENDO UM ATAQUE CARDÍACO!!! DEU MERDA?!? | https://www.youtube.com/watch?v=Y8d-eBADG5k | Vídeo irrelevante |
| 89 | SABIAS QUE: EL ATAQUE CARDÍACO Y EL AGUA VAN DE LA MANO | https://www.youtube.com/watch?v=ivQTAmONl30 | Vídeo irrelevante e língua espanhola |
| 90 | Raio Cai na Mulher e Ela Sofre Ataque Cardíaco | https://www.youtube.com/watch?v=Z5hYKTtf-_c | Vídeo irrelevante |
| 91 | Ladrão morre de ataque cardíaco fulminante !! | https://www.youtube.com/watch?v=S1cI8_MFVjk | Vídeo irrelevante e sem audio |
| 92 | Olha a reação do Porquinho ao ver dona tendo ataque cardíaco | https://www.youtube.com/watch?v=34iBilDhGHE | Vídeo irrelevante |
| 93 | Policial sofre ataque cardíaco depois de matar colega de trabalho | https://www.youtube.com/watch?v=HdtUvc2SiWI | Vídeo irrelevante |
| 94 | SINTOMAS tempranos de ATAQUE CARDIACO, estos consejos pueden SALVAR tu VIDA | https://www.youtube.com/watch?v=IJFQ0R_uRU8 | Língua espanhola |
| 95 | Gonçalo tem ataque cardíaco fulminante e morre - A Favorita - 12/12/08 | https://www.youtube.com/watch?v=eCRPK_sqcOc | Vídeo irrelevante |
| 96 | ELE QUER ME COMER | OUTLAST: WHISTLEBLOWER #02 - Ataque Cardíaco | https://www.youtube.com/watch?v=uWakCiH24vQ | Vídeo irrelevante |
| 97 | 15 alimentos que vao limpar suas arterias naturalmente e proteger voce de um ataque cardiaco | https://www.youtube.com/watch?v=RqUl2-sPHUs | - |
| 98 | CHOQUE NA LINGUA DO EMISU - Ataque Cardíaco Editado 6!!! | https://www.youtube.com/watch?v=XEiUjHGqAOc | Vídeo irrelevante |
| 99 | Comentarista turco tem ataque do coração ao vivo! | https://www.youtube.com/watch?v=XD67_rSWoxo | Vídeo irrelevante e língua turca |
| 100 | Como identificar e o que fazer durante um ataque cardíaco - Mulheres | https://www.youtube.com/watch?v=DPoPVpt7ang | - |
| "ataque + coração" | 1 | INCRÍVEL! Vejam o Coração no Momento de um Ataque Cardíaco(infarto) | https://www.youtube.com/watch?v=xELBOy9DvJY | Vídeo irrelevante e sem audio |
| 2 | Ataque coração fulminante | https://www.youtube.com/watch?v=R3b3r3HsAvk | - |
| 3 | ATAQUE CORAÇÃO | https://www.youtube.com/watch?v=lyVvibY6q4A | Vídeo irrelevante |
| 4 | ESTE REMÉDIO MUITO COMUM PODE PROVOCAR EM VOCÊ UM DERRAME OU ATAQUE FULMINANTE DO CORAÇÃO! | https://www.youtube.com/watch?v=OTCBFUNgK8g | Vídeo irrelevante |
| 5 | Estudo científico revela: infarto dá dois sinais 24 horas antes de acontecer. Quais seriam eles? | https://www.youtube.com/watch?v=AeP2HkOwrlk | - |
| 6 | Homem sofre ataque fulminante e morre em pe | https://www.youtube.com/watch?v=4-YI4QqlpB4 | Vídeo irrelevante |
| 7 | Cantor do momento tem ataque fulminante do coração e morre aos 33 anos | https://www.youtube.com/watch?v=fPPiBgrOaqg | Vídeo irrelevante |
| 8 | infarto do miocárdio como ocorre Entenda o ataque cardíaco | https://www.youtube.com/watch?v=dbiqKLOZaqA | - |
| 9 | Infarto saiba como acontece um ataque cardíaco | https://www.youtube.com/watch?v=p6NnhgUrPfY | Vídeo duplicado |
| 10 | AVISO: você pode ter ATAQUE CORAÇÃO de RIRE - Melhor FALHA FAIL | https://www.youtube.com/watch?v=Q4N5qhQFjyU | Vídeo irrelevante |
| 11 | Infarto Fulminante: entenda sintomas, tratamento e como evitar | https://www.youtube.com/watch?v=m7986KvntOo | - |
| 12 | Infarto: saiba como acontece um ataque cardíaco | https://www.youtube.com/watch?v=INag1QZJ-Pk | Vídeo duplicado |
| 13 | Galo infarta ao vivo | https://www.youtube.com/watch?v=R7U52bSyKJ8 | Vídeo irrelevante |
| 14 | Cavalo, infarto fulminante na hora da monta | https://www.youtube.com/watch?v=_lc_QpgLIoQ | Vídeo irrelevante |
| 15 | Infarto fulminante | https://www.youtube.com/watch?v=Y4fMBiPcVv8 | Vídeo irrelevante |
| 16 | Ladrão tem Infarto Fulminante Após Assaltar um Anjo da Igreja | https://www.youtube.com/watch?v=bKOBp3YPork | Vídeo irrelevante |
| 17 | FUI JOGAR UM JOGO DE TERROR E QUASE TIVE ATAQUE CORAÇÃO !!! (Cry of Fear) | https://www.youtube.com/watch?v=JnB5VXBLfZk | Vídeo irrelevante |
| 18 | Homem tem infarto ao vivo em Brasilía! URGENTE! | https://www.youtube.com/watch?v=89unzbyguvE | Vídeo irrelevante |
| 19 | Ataque do coração | https://www.youtube.com/watch?v=g18OSb1I1fA | Vídeo irrelevante |
| 20 | Ataque do coração | https://www.youtube.com/watch?v=8IfQ9VwB1cc | Vídeo irrelevante |
| 21 | Anedota TO&NANDO - Ataque de coração | https://www.youtube.com/watch?v=lHs8ESsHVpk | Vídeo irrelevante |
| 22 | Infarto fulminante mata o publicitário Marcus Peixoto | https://www.youtube.com/watch?v=JUQ4me40YO0 | - |
| 23 | FULMINANTE - Thalysson e Tarsila HD | https://www.youtube.com/watch?v=kdemgY_BhiE | Vídeo irrelevante |
| 24 | 6 Sinais de Ataque Cardíaco que podem salvar sua vida! | https://www.youtube.com/watch?v=wG8VNRM2qYI | Vídeo duplicado |
| 25 | Principais sinais de ATAQUE DO CORAÇÃO 🔴🔵 Uninove | https://www.youtube.com/watch?v=u_NEJwpnK0s | - |
| 26 | 15 Alimentos Que Diminuem o Risco de Ataque Cardíaco | https://www.youtube.com/watch?v=mJ01ifKTiZI | Vídeo duplicado |
| 27 | 10 Sinais Alarmantes De Que O Seu Coração Não Está Funcionando Direito | https://www.youtube.com/watch?v=cp172xNnRhk | Vídeo duplicado |
| 28 | Eu vou ter um infarto do coração (OFICIAL) | https://www.youtube.com/watch?v=61_5vhjFUYU | Vídeo irrelevante |
| 29 | TV CNE: Jogador sofre parada cardíaca em jogo de futebol amador | https://www.youtube.com/watch?v=RdYpjqSzHnE | Vídeo irrelevante |
| 30 | 3D animação médica: ataque de coração, aterosclerose | https://www.youtube.com/watch?v=TL5AghITAmU | - |
| 31 | 6 Sinais Que o Infarto dá 1 Mês Antes de Acontecer ❤️ FIQUE ATENTO | https://www.youtube.com/watch?v=jVYvijNsgiM | - |
| 32 | Diferença Entre um Ataque Cardíaco e uma Crise de Pânico! | Dicas de Saúde | https://www.youtube.com/watch?v=P_MD8mTGIkE | Vídeo duplicado |
| 33 | Um mês antes de um ataque cardíaco, seu corpo vai avisar você com estes 9 sinais! | https://www.youtube.com/watch?v=oOKygxmAGmk | Vídeo duplicado |
| 34 | Entenda por que o risco de ataque do coração aumenta no inverno | https://www.youtube.com/watch?v=t8qASYRir0Y | - |
| 35 | Infarto Agudo do Miocardio - Parte 2 | https://www.youtube.com/watch?v=cbndiwW65rU | Vídeo duplicado |
| 36 | Infarto (ataque cardíaco) | Dicas de Saúde | https://www.youtube.com/watch?v=sEY_kS4fb-g | Vídeo duplicado |
| 37 | COMO ACONTECE UM INFARTO (ATAQUE CARDÍACO) - Dr. Marcelo Lima | https://www.youtube.com/watch?v=gYY-T8qnaXI | Vídeo duplicado |
| 38 | Como reconhecer um ataque cardíaco um mês antes que aconteça | https://www.youtube.com/watch?v=U8geVcjicRM | Vídeo duplicado |
| 39 | Homem sofre ataque cardíaco e morre enquanto dançava | https://www.youtube.com/watch?v=GDABRGE4mbg | Vídeo duplicado |
| 40 | Como Diferenciar um Ataque Cardíaco de uma Crise de Pânico | Dicas de Saúde | https://www.youtube.com/watch?v=kzkSaqgZWV4 | Vídeo duplicado |
| 41 | Jugador del Ajax, Abdelhak Nouri sufre ataque cardíaco en partido amistoso | https://www.youtube.com/watch?v=iOP3AAVM8gE | Vídeo duplicado |
| 42 | Você Sabia que Parada Cardíaca e Ataque Cardíaco não são a mesma coisa? Saiba como se prevenir. | https://www.youtube.com/watch?v=sxC2PqU-qkI | Vídeo duplicado |
| 43 | Vídeo registra homem sofrendo infarto na Santa Casa de Cruzeiro e choca população | https://www.youtube.com/watch?v=SS6-TzheAug | Vídeo irrelevante |
| 44 | Câmera registra momento em que mulher sofre ataque cardíaco durante exercício em academia | https://www.youtube.com/watch?v=AARE7lUVkzk | Vídeo duplicado |
| 45 | 12 SINAIS DE QUE VOCÊ PODE TER UM ATAQUE CARDÍACO EM BREVE | https://www.youtube.com/watch?v=lYwReiPvT7I | Vídeo duplicado |
| 46 | ATAQUE CARDÍACO NERDCAST STORIES | https://www.youtube.com/watch?v=ZVDHzV35V-8 | Vídeo duplicado |
| 47 | 4 sintomas que você pode sentir antes de ter um ATAQUE CARDÍACO! | https://www.youtube.com/watch?v=a4AusuMxc1k | Vídeo duplicado |
| 48 | Sofri um ATAQUE DO CORAÇÃO 💖💀 | https://www.youtube.com/watch?v=dmS5Qel8onA | Vídeo irrelevante |
| 49 | O corpo avisa sobre um ataque cardíaco um mês antes! | https://www.youtube.com/watch?v=0s3Qt2UK1sg | - |
| 50 | Ataque Cardíaco 30 Dias Antes de Acontecer Conheçam 5 Sintomas A Obstruções Das Artérias Do Coração. | https://www.youtube.com/watch?v=9SUSPItIdV0 | Vídeo duplicado |
| 51 | CUIDADO! ESTE REMÉDIO MUITO COMUM PODE PROVOCAR EM VOCÊ UM DERRAME OU ATAQUE FULMINANTE DO CORAÇÃO! | https://www.youtube.com/watch?v=bkuZDAUsCJc | Vídeo duplicado |
| 52 | ⭐️❤️Infarto feminino: 7 sintomas que costumam passar despercebidos | https://www.youtube.com/watch?v=vtU1G1haYws | - |
| 53 | Esta Receita Suga Toda a Gordura das Veias e Deixa Suas Artérias Limpa Como Novas | https://www.youtube.com/watch?v=JW46KSDBJLw | Vídeo irrelevante |
| 54 | Ladrão infarta e morre durante tentativa de assalto | SBT Notícias (28/01/2019) | https://www.youtube.com/watch?v=CI1dtWkCL-Y | Vídeo irrelevante |
| 55 | Chá que Fortalece o Coração, Evita Infartos, Ataque Cardíaco e Arritmia!! 💖 REMÉDIO CASEIRO 120 | https://www.youtube.com/watch?v=LPhpBtNkN-Q | Vídeo irrelevante |
| 56 | Dica de Saúde: sinais do ataque cardíaco | https://www.youtube.com/watch?v=QyPQhOmKq_M | - |
| 57 | Como diminuir o risco de ataque cardiáco e AVC em 75% | https://www.youtube.com/watch?v=Z0VOVhRppiE | - |
| 58 | ⭐️❤️15 alimentos que vao limpar suas arterias naturalmente e proteger voce de um ataque cardiaco | https://www.youtube.com/watch?v=RqUl2-sPHUs | Vídeo duplicado |
| 59 | Qual a diferença entre infarto e ataque cardíaco? | https://www.youtube.com/watch?v=eGJnEpEhBT8 | Vídeo duplicado |
| 60 | Ataque do Coração | https://www.youtube.com/watch?v=4B7FL15gars | Vídeo irrelevante |
| 61 | INFARTO AGUDO DO MIOCÁRDIO - Ataque Cardíaco - Causas - Parte 2 - Dr. Júlio Caleiro | https://www.youtube.com/watch?v=lxp08dmK0P8 | Vídeo duplicado |
| 62 | DESMAIO OU ATAQUE CARDIACO EM CÃES 30.10.12.wmv | https://www.youtube.com/watch?v=cwU3G9ox0qg | Vídeo irrelevante |
| 63 | MORTE AO VIVO ATAQUE DO CORAÇÃO | https://www.youtube.com/watch?v=v1CEtQ7EaGM | Vídeo irrelevante |
| 64 | ANSIEDADE: TENHO DOR NO PEITO. VOU TER UM ATAQUE CARDÍACO? | https://www.youtube.com/watch?v=rjFAoAUM8Uc | Vídeo duplicado |
| 65 | 7 Sintomas De Ataque Cardíaco Silencioso Que As Mulheres Podem Estar Ignorando | https://www.youtube.com/watch?v=AREwwcJiijU | Vídeo duplicado |
| 66 | Diego & Victor Hugo - Infarto | https://www.youtube.com/watch?v=BJfnGsvOmWM | Vídeo irrelevante |
| 67 | Ataque Cardíaco em gestante/ Sistema Holter | https://www.youtube.com/watch?v=t5zSHdy2XTw | Vídeo duplicado |
| 68 | É possível morrer do coração durante um ataque de Pânico? | https://www.youtube.com/watch?v=vhnnjaf165A | Vídeo irrelevante |
| 69 | FIQUE ATENTO👀 Sabia Que O ATAQUE CARDÍACO E A Água Estão Relacionados? | https://www.youtube.com/watch?v=dHQBGec7dO8 | Vídeo duplicado |
| 70 | Ataque cardíaco ao vivo | https://www.youtube.com/watch?v=rBkB5nnIfPQ | Vídeo irrelevante |
| 71 | Ataque cardíaco - O que fazer para salvar a pessoa | https://www.youtube.com/watch?v=VSNu4-gEjCA | Língua inglesa |
| 72 | MACONHA + ATAQUE DO CORAÇÃO = AI MEU DEUS! | https://www.youtube.com/watch?v=4jaTWW-Qjts | Vídeo irrelevante e língua inglesa |
| 73 | Ataque do coração | https://www.youtube.com/watch?v=ifDlWaJ0F0U | Vídeo irrelevante |
| 74 | TIVE UM ATAQUE DO CORAÇÃO - Raft | https://www.youtube.com/watch?v=B8c1P1sCyzQ | Vídeo irrelevante |
| 75 | A THALITA QUASE TEVE UM ATAQUE DO CORAÇÃO | https://www.youtube.com/watch?v=IAl2JuD4leA | Vídeo irrelevante |
| 76 | Distinguir a dor de um ataque cardíaco de um ataque de pânico | https://www.youtube.com/watch?v=3hizuCwnlTI | - |
| 77 | 4 ATITUDES QUE PODEM LEVAR A UM ATAQUE CARDÍACO | https://www.youtube.com/watch?v=IP_eizIbbRM | - |
| 78 | Bom Dia: Bandido tem ataque cardíaco e morre em assalto | https://www.youtube.com/watch?v=05Fy48_3_yQ | Vídeo irrelevante |
| 79 | Pássaro com ataque cardíaco?, convulsões?, ataque epilético?, asma? | https://www.youtube.com/watch?v=LooBr5gvx_0 | Vídeo irrelevante |
| 80 | 12 sinais que podem indicar problemas no coração | https://www.youtube.com/watch?v=IUmWGsctJ6Q | - |
| 81 | Policial sofre ataque cardíaco depois de matar colega de trabalho | https://www.youtube.com/watch?v=HdtUvc2SiWI | Vídeo duplicado |
| 82 | Câmeras segurança registra momento em que jovem ofre ataque cardíaco durante exercício em academia | https://www.youtube.com/watch?v=3GtqcIRCkuk | Vídeo duplicado |
| 83 | heart attack - Ataque do Coração | https://www.youtube.com/watch?v=XPujz9cgbgM | Vídeo irrelevante |
| 84 | QUASE TIVE UM ATAQUE DO CORAÇÃO | https://www.youtube.com/watch?v=Bzgo8Z8Izeo | Vídeo irrelevante |
| 85 | Sinais de ataque cardíaco confundem pacientes de síndrome do pânico | https://www.youtube.com/watch?v=110kI5xAPl8 | Vídeo duplicado |
| 86 | Beba Isso Toda Manhãs Para Diminuir o Risco de um Ataque Cardíaco | https://www.youtube.com/watch?v=7XbQAGS3eUM | Vídeo irrelevante |
| 87 | COMO PODERÁS SOBREVIVER A UM ATAQUE DO CORAÇÃO, QUANDO TE ENCONTRARES SÓ | https://www.youtube.com/watch?v=6fNIVf_kNDA | Vídeo irrelevante e sem audio |
| 88 | Comentarista turco tem ataque do coração ao vivo! | https://www.youtube.com/watch?v=XD67_rSWoxo | Vídeo duplicado |
| 89 | 4 SINAIS QUE SEU CORPO DÁ ANTES DE UM INFARTO | Dr Dayan Siebra | https://www.youtube.com/watch?v=uJs2XlTgb_A | - |
| 90 | 6 sintomas de um problema no pâncreas | https://www.youtube.com/watch?v=RVfFOGFqmp0 | Vídeo irrelevante |
| 91 | Dor no Peito e Infarto. Chá de Emergência! 💖 REMÉDIO CASEIRO 268 | https://www.youtube.com/watch?v=vqoL7CQmHAM | Vídeo irrelevante |
| 92 | Incrível Coração em pleno ataque cardíaco | https://www.youtube.com/watch?v=XME0z21dWbw | Vídeo duplicado |
| 93 | Primeiros socorros: o que fazer em casos de ataque cardíaco | https://www.youtube.com/watch?v=HcvJ69Gydeg | Vídeo duplicado |
| 94 | Parada Cardíaca e Ataque Cardíaco | https://www.youtube.com/watch?v=RfLP1VR1KO0 | - |
| 95 | infarto do miocárdio como ocorre? Entenda o ataque cardíaco | https://www.youtube.com/watch?v=kqGVXAKOEF4 | Vídeo duplicado |
| 96 | Ataque de coração | https://www.youtube.com/watch?v=c_COacGnop0 | Vídeo irrelevante e sem audio |
| 97 | Cigarro e Infarto (Ataque cardíaco) | https://www.youtube.com/watch?v=W9-CSCj0eGg | - |
| 98 | Demi Lovato - Heart Attack | https://www.youtube.com/watch?v=AByfaYcOm4A | Vídeo irrelevante e língua inglesa |
| 99 | TIVE UM ATAQUE DO CORAÇÃO | https://www.youtube.com/watch?v=L2nQIRNMxHw | Vídeo irrelevante |
| 100 | Iker Casillas sofre ataque cardíaco! | https://www.youtube.com/watch?v=ohI_V-rs-E4 | Vídeo duplicado |
| "enfarte – cerebral” | 1 | Enfarte do miocárdio | https://www.youtube.com/watch?v=-bFcULh08xc | - |
| 2 | STENT FOR LIFE: O enfarte não pode esperar | https://www.youtube.com/watch?v=5_QFlY9r41Y | - |
| 3 | Conheça os Sinais Que o Enfarto dá Antes de Acontecer! Dicas de Saúde | https://www.youtube.com/watch?v=lgjjUEKCJKA | - |
| 4 | Enfarte | https://www.youtube.com/watch?v=S30cNpwYCGA | - |
| 5 | Vídeo educativo ensina crianças a prevenir o enfarte | https://www.youtube.com/watch?v=B6cjwCZfMKc | - |
| 6 | Sobreviver a um enfarte | https://www.youtube.com/watch?v=vm8HRpW7aXk | Vídeo irrelevante |
| 7 | Enfarte agudo do miocárdio em choque cardiogénico: um caso clínico em destaque no Heart Failure 2019 | https://www.youtube.com/watch?v=AENOMXpUL44 | - |
| 8 | José Carlos Malato sofreu um enfarte do miocárdio em 2013 | https://www.youtube.com/watch?v=7-ojaDOV-H0 | - |
| 9 | Em coma 15 dias com edema pulmonar e enfarte do miocárdio . Mais Deus fez milagre | https://www.youtube.com/watch?v=LMFWcLnwOOI | Vídeo irrelevante |
| 10 | Morte por enfarte é mais provável nas mulheres por erro de diagnóstico | https://www.youtube.com/watch?v=IXPSzFvFeQ0 | Vídeo irrelevante |
| 11 | Infarto: saiba como acontece um ataque cardíaco | https://www.youtube.com/watch?v=INag1QZJ-Pk | Vídeo duplicado |
| 12 | Você sabe como ocorre o Infarto Agudo do Miocárdio? | https://www.youtube.com/watch?v=BY4KWJzVd74 | - |
| 13 | Dr. Drauzio Varella explica como identificar e agir diante de um infarto | https://www.youtube.com/watch?v=QFSm6HhXU50 | Vídeo duplicado |
| 14 | Enfarte Agudo do Miocárdio | https://www.youtube.com/watch?v=GhdzMxgbSaw | - |
| 15 | Diogo revela o seu segredo "sofri um enfarte do mio-cárdio" e confessa que se drogava com cocaina | https://www.youtube.com/watch?v=pbYxaEfPvmE | Vídeo irrelevante |
| 16 | Enfarte Agudo do Miocárdio | https://www.youtube.com/watch?v=RbhYomtKR60 | - |
| 17 | Enfarte agudo do miocárdio | https://www.youtube.com/watch?v=T6Ea0THKJYg | - |
| 18 | [Dancin' Days] Zé Maria tem um enfarte | https://www.youtube.com/watch?v=_FwvX905eJc | Vídeo irrelevante |
| 19 | Enfarte nas Mulheres | https://www.youtube.com/watch?v=CSltN4o-7J0 | - |
| 20 | Iker Casillas emocionado nas primeiras declarações depois de ter sofrido um enfarte do miocárdio | https://www.youtube.com/watch?v=31ye9Ubix28 | Vídeo irrelevante |
| 21 | Enfarte do Miocárdio - Reportagem no Centro Hospitalar de Setúbal | https://www.youtube.com/watch?v=OBG9i_F7PoE | - |
| 22 | ENFARTE-AVC-ARTRITE-OSTEOPOROSE VEJA O QUE NÃO TE CONTARAM !! COMPARTILHE | https://www.youtube.com/watch?v=TrhjuAsGkDI | - |
| 23 | O vídeo de Casillas "emocionado" com mensagens de apoio após enfarte | https://www.youtube.com/watch?v=bUjWRvVzxSs | Vídeo irrelevante e língua espanhola |
| 24 | GNR multa ambulância com equipa que socorria idosa com enfarte do miocárdio | https://www.youtube.com/watch?v=G3IK--S7QX0 | Vídeo irrelevante |
| 25 | Médicos explicam o que aconteceu a Iker Casillas | https://www.youtube.com/watch?v=9VFkCU-1kDc | - |
| 26 | [Dancin' Days] Zé Maria sobrevive ao enfarte | https://www.youtube.com/watch?v=QjGWCh6zyfE | Vídeo irrelevante |
| 27 | Enfarte Agudo Miocárdio mp4 | https://www.youtube.com/watch?v=hwa-mHdq07o | Vídeo irrelevante |
| 28 | Morrem oito mil portugueses por ano com enfarte agudo do miocárdio | https://www.youtube.com/watch?v=ba2IQPbqqFM | - |
| 29 | 2. Enfarte, enfarto, infarte ou infarto? | https://www.youtube.com/watch?v=xBnVaX3wx2c | Vídeo irrelevante |
| 30 | Enfarte Agudo Miocárdio | https://www.youtube.com/watch?v=QyUajeQixCI | Vídeo duplicado |
| 31 | 1 - Enfarte Agudo do Miocárdio - SBV para Crianças | https://www.youtube.com/watch?v=TDcTREk_Lh0 | - |
| 32 | Infarto, enfarto, infarte ou enfarte? | https://www.youtube.com/watch?v=vhTgk5pj6XE | Vídeo irrelevante |
| 33 | Iker Casillas internado de urgência após sofrer enfarte agudo do miocárdio | https://www.youtube.com/watch?v=TkNkOrQLHo4 | Vídeo irrelevante |
| 34 | Bandido tem enfarte ao tentar assaltar Pastor | https://www.youtube.com/watch?v=BDha0mFHpEo | Vídeo irrelevante |
| 35 | Anatomia Patológica - Enfarte do miocárdio ampliada | https://www.youtube.com/watch?v=KJ4ijxw9mF0 | Vídeo irrelevante |
| 36 | Como evitar a mortalidade por enfarte agudo do miocárdio em contexto hospitalar | https://www.youtube.com/watch?v=alyFj2do_-s | - |
| 37 | "O enfarte não pode esperar. 112 uma linha que nos liga à vida" | https://www.youtube.com/watch?v=T2Kok8YiYi4 | Vídeo duplicado |
| 38 | Enfarte mata!!Veja o vídeo e entenda porque. | https://www.youtube.com/watch?v=B7sFgO4tYSg | - |
| 39 | VoxPop | O que sabem as pessoas sobre o enfarte? | https://www.youtube.com/watch?v=xAQM0_fEioo | - |
| 40 | QUASE TIVE UM ENFARTE - FORTNITE BATTLE ROYALE | https://www.youtube.com/watch?v=QD7Rog1G4bo | Vídeo irrelevante |
| 41 | Impacto da reabilitação cardíaca após enfarte do miocárdio | https://www.youtube.com/watch?v=VmMjEDZgLIU | - |
| 42 | Ataque cardíaco ￼ ￼ ￼ ￼ ￼ Também chamada de: Enfarte agudo do miocárdio | https://www.youtube.com/watch?v=2iEJ7aI27Ao | Vídeo duplicado |
| 43 | Anatomia Patológica - Enfarte do miocárdio | https://www.youtube.com/watch?v=a1kyIbbCgLo | Vídeo irrelevante |
| 44 | PRANK || MINHA MÃE DESCOBRIU AS MINHAS DROGAS😰 E QUASE APANHOU UM ENFARTE | https://www.youtube.com/watch?v=mM6nZGZY4OU | Vídeo irrelevante |
| 45 | O que é um enfarte do miocárdio? Por que se produz? | https://www.youtube.com/watch?v=Lxh4APWyuHs | Língua inglesa |
| 46 | Sara Carbonero - Após enfarte de Iker Casillas, jornalista luta contra um cancro nos ovários | https://www.youtube.com/watch?v=cLIFb8kIYg8 | Vídeo irrelevante |
| 47 | Iker Casillas, atividade física e enfarte | https://www.youtube.com/watch?v=IXlJ5qFFzx4 | - |
| 48 | Reportagem | Stent for Life sensibiliza peregrinos para o enfarte | https://www.youtube.com/watch?v=LmLM0aKLnMM | - |
| 49 | Presidente do Uzbequistão internado com suspeita de enfarte | https://www.youtube.com/watch?v=goQub4MnFgU | Vídeo irrelevante |
| 50 | 6 Sinais De Que Um Derrame Está a Caminho | https://www.youtube.com/watch?v=VDxu9ABiaGk&list=PLJWA5M4zN9ZcNvaH3M8FtocQsW_qdURMO&index=1 | Vídeo irrelevante |
| 51 | Por pouco que da um enfarte com o susto!!! | https://www.youtube.com/watch?v=PR2kqJZ4FgQ | Vídeo irrelevante |
| 52 | Cardiologista diz que "quase de certeza absoluta que Casillas vai ficar bem" | https://www.youtube.com/watch?v=CLAp0JXeJs8 | Vídeo duplicado |
| 53 | Profilaxia do Enfarte -- Bem-vindos a Beirais | https://www.youtube.com/watch?v=Mb36FtkbJ9c | - |
| 54 | Depois do susto do enfarte e do cancro de Sara Carbonero, Iker Casillas faz as pazes com os pais | https://www.youtube.com/watch?v=dsMGMIEAXzk | Vídeo irrelevante e sem audio |
| 55 | Enfarte no Restaurante | https://www.youtube.com/watch?v=RLvVLUqzboU | Vídeo irrelevante |
| 56 | Sara Carbonero quebra silêncio sobre o enfarte de Iker Casillas | https://www.youtube.com/watch?v=3vKsLViZi5M | Vídeo irrelevante e sem audio |
| 57 | Principais sinais de ATAQUE DO CORAÇÃO 🔴🔵 Uninove | https://www.youtube.com/watch?v=u_NEJwpnK0s | Vídeo duplicado |
| 58 | Do enfarte à 1ª medalha: a saga de um ex-sedentário rumo aos 5k | https://www.youtube.com/watch?v=ceRqIxhY98k | Vídeo irrelevante |
| 59 | Doutor Pimpolho - Enfarte do Pimpolho | https://www.youtube.com/watch?v=dx382sPrJBM | Vídeo irrelevante |
| 60 | QUASE TIVE UM ENFARTE | https://www.youtube.com/watch?v=9Ne1V4RXlK4 | Vídeo irrelevante |
| 61 | Atriz brasileira sofre enfarte em Portugal | Bra News | https://www.youtube.com/watch?v=E1KB-QDZ-ks | Vídeo irrelevante |
| 62 | INFARTO, ENFARTO, ENFARTE... qual maneira está certa? | Cíntia Chagas | https://www.youtube.com/watch?v=BPITTguZmLc | Vídeo irrelevante |
| 63 | Pai de Inês emociona-se ao recordar o dia em que a filha sofreu um enfarte - A Tarde é Sua | https://www.youtube.com/watch?v=w3zZvS8ocEA | Vídeo irrelevante |
| 64 | ENFARTE DO AMOR - DANI MÍDIA - AO VIVO (COMPOSIÇÃO: BOB LÉO) | https://www.youtube.com/watch?v=aDSainaAK2o | Vídeo irrelevante |
| 65 | Treininho Enfarte!!! | https://www.youtube.com/watch?v=ZaNPAmn2QeM | Vídeo irrelevante |
| 66 | Dia do Doente Coronário - Entrevista ao Dr. Pedro Farto e Abreu | https://www.youtube.com/watch?v=dIsxOr3yg-g&list=PLZHEvVRTN208744SLdoyIfm9eej9zkhtY&index=2 | - |
| 67 | Enfarte - Testemunho | https://www.youtube.com/watch?v=EOdeuQBOO_4&list=PLZHEvVRTN208744SLdoyIfm9eej9zkhtY&index=3 | - |
| 68 | Enfarte na mulher - Entrevista ao Dr. Pedro Farto e Abreu | https://www.youtube.com/watch?v=7cke2SWRCRs&list=PLZHEvVRTN208744SLdoyIfm9eej9zkhtY&index=4 | - |
| 69 | Cada segundo conta | https://www.youtube.com/watch?v=k9AYmkja4LQ&list=PLZHEvVRTN208744SLdoyIfm9eej9zkhtY&index=5 | - |
| 70 | Entrevista RTP - cada segundo conta | https://www.youtube.com/watch?v=ImwTLBr76MQ&list=PLZHEvVRTN208744SLdoyIfm9eej9zkhtY&index=6 | - |
| 71 | Entrevista Porto Canal - cada segundo conta | https://www.youtube.com/watch?v=QQUrnEgn0EE&list=PLZHEvVRTN208744SLdoyIfm9eej9zkhtY&index=7 | - |
| 72 | Cada Segundo Conta - Serenella Andrade | https://www.youtube.com/watch?v=7K8hW2bC02g&list=PLZHEvVRTN208744SLdoyIfm9eej9zkhtY&index=8 | - |
| 73 | ALVAIADE - Concurso Para Enfarte | https://www.youtube.com/watch?v=SSDR9WDSaaw | Vídeo irrelevante |
| 74 | Médico de Mirandela errou diagnóstico de enfarte a doente de 69 anos | https://www.youtube.com/watch?v=vaIGLhU_5kI | Vídeo irrelevante |
| 75 | Enfarte nos barcos | https://www.youtube.com/watch?v=wSQq5S5pAh0 | Vídeo irrelevante e sem audio |
| 76 | Seja mais rápido que um enfarte - Ruy de Carvalho | https://www.youtube.com/watch?v=XMbnZzGDAno | - |
| 77 | Enfarte | https://www.youtube.com/watch?v=L9omL0l9olY | Vídeo irrelevante |
| 78 | Taquicárdia - enfarte 11 | https://www.youtube.com/watch?v=CofgnkBilUo | Vídeo irrelevante |
| 79 | Enfarte do miocárdio | https://www.youtube.com/watch?v=dqgecCDEWgY | - |
| 80 | Jusis Prank Calls extra - Enfarte | https://www.youtube.com/watch?v=YdzZGb0SHL4 | Vídeo irrelevante |
| 81 | Entrevista SIC - Cada Segundo Conta | https://www.youtube.com/watch?v=1hIC60AmQt0&list=PLZHEvVRTN208744SLdoyIfm9eej9zkhtY&index=25 | - |
| 82 | Canal S+ - Cada Segundo Conta | https://www.youtube.com/watch?v=rsBLqHT-t7c&list=PLZHEvVRTN208744SLdoyIfm9eej9zkhtY&index=26 | - |
| 83 | Entrevista Porto Canal - Dra. Elisabete Jorge | https://www.youtube.com/watch?v=L5loh0OjLPU&list=PLZHEvVRTN208744SLdoyIfm9eej9zkhtY&index=27 | - |
| 84 | CONCURSO PARA ENFARTE - OSVALDO DOS SANTOS | https://www.youtube.com/watch?v=5_U0i-qpXzc | Vídeo irrelevante |
| 85 | Obrigado, Dilma! Maquiagem de Macron e Enfarte de Chuck Norris | https://www.youtube.com/watch?v=jIP51p_8Vhg | Vídeo irrelevante |
| 86 | Seja mais rápido que um enfarte | https://www.youtube.com/watch?v=Gp1ezJZzncI | Vídeo duplicado |
| 87 | Cada Segundo Conta - Pedro Couceiro | https://www.youtube.com/watch?v=n9r4YoO95Vs | Vídeo duplicado |
| 88 | Cada Segundo Conta - Vasco Domingos | https://www.youtube.com/watch?v=uSEF1WVLP0A | Vídeo duplicado |
| 89 | Cada Segundo Conta - Joana Vieira | https://www.youtube.com/watch?v=9yYrLyZ_Udg | Vídeo duplicado |
| 90 | Cada Segundo Conta - Mariana Alvim | https://www.youtube.com/watch?v=eFXYZTcXnHU | Vídeo duplicado |
| 91 | Cada Segundo Conta - António Sala | https://www.youtube.com/watch?v=z4rQ872mQPI | Vídeo duplicado |
| 92 | Cada Segundo Conta - Pedro Farto e Abreu | https://www.youtube.com/watch?v=REUWJQYCmGQ | Vídeo duplicado |
| 93 | Cada Segundo Conta - João Moleira | https://www.youtube.com/watch?v=bPDDG2xeNqQ | Vídeo duplicado |
| 94 | Cada Segundo Conta - Isabel Moiçó | https://www.youtube.com/watch?v=fPZWweLGoRo | Vídeo duplicado |
| 95 | Cada Segundo Conta - João Parreira | https://www.youtube.com/watch?v=-C3qrlZxFe4 | Vídeo duplicado |
| 96 | Cada Segundo Conta - Ana Bravo | https://www.youtube.com/watch?v=46LKe5SN748 | Vídeo duplicado |
| 97 | Cada Segundo Conta - Margarida Marques de Almeida | https://www.youtube.com/watch?v=SIf2PyjktgE | Vídeo duplicado |
| 98 | Cada Segundo Conta - Vera Lúcia Arreigoso | https://www.youtube.com/watch?v=QISB2vyqPwI&list=PLZHEvVRTN208744SLdoyIfm9eej9zkhtY&index=9 | Vídeo duplicado |
| 99 | Cada Segundo Conta - Bruno Santos | https://www.youtube.com/watch?v=sTuMpRb5K4c&list=PLZHEvVRTN208744SLdoyIfm9eej9zkhtY&index=16 | Vídeo duplicado |
| 100 | Luto - Morre de enfarte o presidente da FPF, Carlos Alberto de Oliveira - FutbolPE | https://www.youtube.com/watch?v=4yoVTltH3CI | Vídeo irrelevante |
| "infarto - cerebral" | 1 | Diego & Victor Hugo - Infarto | https://www.youtube.com/watch?v=BJfnGsvOmWM | Vídeo duplicado |
| 2 | Infarto em mulheres | https://www.youtube.com/watch?v=P0x0gkc80Ts | - |
| 3 | COMO ACONTECE UM INFARTO (ATAQUE CARDÍACO) - Dr. Marcelo Lima | https://www.youtube.com/watch?v=gYY-T8qnaXI | Vídeo duplicado |
| 4 | 4 SINAIS QUE SEU CORPO DÁ ANTES DE UM INFARTO | Dr Dayan Siebra | https://www.youtube.com/watch?v=uJs2XlTgb_A | Vídeo duplicado |
| 5 | DICAS DE SAÚDE - RISCO DE INFARTO E AVC | DR LAIR RIBEIRO 11/04 | https://www.youtube.com/watch?v=qEJdkmENl7c | Vídeo duplicado |
| 6 | INFARTO AGUDO DO MIOCÁRDIO | SÉRIE SAÚDE BRASIL | https://www.youtube.com/watch?v=LGxD1lffW7w | - |
| 7 | Infarto Fulminante: entenda sintomas, tratamento e como evitar | https://www.youtube.com/watch?v=m7986KvntOo | Vídeo duplicado |
| 8 | Infarto - Diego e Victor Hugo (Thayná Bitencourt - cover) | https://www.youtube.com/watch?v=sqvlaFeHitI | Vídeo irrelevante |
| 9 | Infarto (Ao Vivo em Brasília) | https://www.youtube.com/watch?v=o1Ldfp-liS8 | Vídeo irrelevante |
| 10 | infarto do miocárdio como ocorre? Entenda o ataque cardíaco | https://www.youtube.com/watch?v=kqGVXAKOEF4 | Vídeo duplicado |
| 11 | Isquemia e Infarto - Resumo - Patologia Geral | https://www.youtube.com/watch?v=NM2ji-fpCZU | - |
| 12 | Conheça os SINAIS antes de um infarto - Mulheres (21/02/19) | https://www.youtube.com/watch?v=iM0-F19w3cE | - |
| 13 | Henrique e Juliano - GARRAFAS VAZIAS - DVD Menos é Mais - IG henriqueejuliano | https://www.youtube.com/watch?v=DKeyi1YGhBc | Vídeo irrelevante |
| 14 | Lauana Prado - Cobaia (Ao Vivo) | https://www.youtube.com/watch?v=-ZByWa9hH5s | Vídeo irrelevante |
| 15 | Marília Mendonça - SEM SAL (TODOS OS CANTOS) | https://www.youtube.com/watch?v=czOoOSLVwRI | Vídeo irrelevante |
| 16 | Como é a dor do Infarto? Quais o sintomas do Infarto? | https://www.youtube.com/watch?v=8tVQt9BNGng | - |
| 17 | 10 Sinais Alarmantes De Que O Seu Coração Não Está Funcionando Direito | https://www.youtube.com/watch?v=cp172xNnRhk | Vídeo duplicado |
| 18 | Priscila Senna, A Musa - Infarto [Promocional 2019.2] | https://www.youtube.com/watch?v=q84V5YwaQVg | Vídeo irrelevante |
| 19 | 4 sinais que o infarto dá até 1 mês antes de acontecer | https://www.youtube.com/watch?v=aC8vRvAsuSQ | - |
| 20 | Infarto - Diego E Victor Hugo (Cover Bruno Braz) | https://www.youtube.com/watch?v=JooD6vF6bCQ | Vídeo irrelevante |
| 21 | Karaokê Infarto - Diego e Victor Hugo | https://www.youtube.com/watch?v=3sCsn6w-mh0 | Vídeo irrelevante |
| 22 | 15 Alimentos Que Diminuem o Risco de Ataque Cardíaco | https://www.youtube.com/watch?v=mJ01ifKTiZI | Vídeo duplicado |
| 23 | Infarto | https://www.youtube.com/watch?v=Jn5OwbV9xPY | Vídeo irrelevante |
| 24 | Infarto Agudo do Miocardio - Parte 2 | https://www.youtube.com/watch?v=cbndiwW65rU | Vídeo duplicado |
| 25 | Infarto - Cover Ivan e Allan ( Diego e Vitor Hugo) | https://www.youtube.com/watch?v=xrykSKHIU2g | Vídeo irrelevante |
| 26 | INFARTO - XAND AVIÃO | https://www.youtube.com/watch?v=xKgzqtAawc8 | Vídeo irrelevante |
| 27 | Infarto - Diego e Victor Hugo (Cover - Marcela Ferreira) | https://www.youtube.com/watch?v=PC9Q-OyhbTc | Vídeo irrelevante |
| 28 | 5 Sinais de Infarto que você NÃO conhece - Dr Lucas Fustinoni Médico - CRMPR: 30155 | https://www.youtube.com/watch?v=ftWaQHJgpls | - |
| 29 | GTG - INFARTO (COVER DIEGO E VICTOR HUGO) | https://www.youtube.com/watch?v=j-1f2WacIQY | Vídeo irrelevante |
| 30 | Infarto - Diego e Victor Hugo Aula Solo Violão (como tocar) | https://www.youtube.com/watch?v=9IoLF9H_F_k | Vídeo irrelevante |
| 31 | ♫ VASCO É VICE DE NOVO | Paródia Infarto - Diego & Victor Hugo | https://www.youtube.com/watch?v=dg76cPZPOy4 | Vídeo irrelevante |
| 32 | Entenda as causas do infarto, ataque que matou José Wilker | https://www.youtube.com/watch?v=hf-Bid4no-c | - |
| 33 | NBLOGS - Sintomas de infarto nas mulheres | https://www.youtube.com/watch?v=vJl2HiCdqyw | - |
| 34 | 10 dicas para prevenir o infarto | IMEB | https://www.youtube.com/watch?v=Se5ve-Q_VV0 | - |
| 35 | Xand Avião Infarto Maio - 2019 | https://www.youtube.com/watch?v=IBHOx0dPtCc | Vídeo irrelevante |
| 36 | Infarto - Diego & Victor Hugo - Sem Reznha Acústico - Versão Acústico | https://www.youtube.com/watch?v=519pt6FOyvU | Vídeo irrelevante |
| 37 | Diego e Victor Hugo - Infarto (Caldas Country 2018) | https://www.youtube.com/watch?v=_BAMy6iRx_8 | Vídeo irrelevante |
| 38 | Infarto do Miocárdio – causas, sintomas e tratamento | https://www.youtube.com/watch?v=w68dX5jvEFA | - |
| 39 | Primeiros Socorros em caso de Infarto e Parada Cardíaca - Você Bonita (19/07/17) | https://www.youtube.com/watch?v=r_aqZ8javqs | - |
| 40 | Infarto - Drum Cover - Pierre Maskaro | https://www.youtube.com/watch?v=Q5Pe97jflIE | Vídeo irrelevante |
| 41 | HCorExplica - Sintomas do Infarto Agudo do Miocárdio | https://www.youtube.com/watch?v=uyEAf4ySBOw | - |
| 42 | Dieta para evitar o infarto! | https://www.youtube.com/watch?v=Vf7M_PSUOr0 | - |
| 43 | O infarto de Sikêra Jr: uísque, energético e cigarro | https://www.youtube.com/watch?v=m_Qh8nSrzgY | - |
| 44 | Infarto - Tayrone *Ao Vivo* | https://www.youtube.com/watch?v=tDglsQoiWkE | Vídeo irrelevante |
| 45 | GABRIEL DINIZ - INFARTO | Repertório Novo | https://www.youtube.com/watch?v=TtawJ1eThus | Vídeo irrelevante |
| 46 | ESTRESSE PODE LEVAR AO INFARTO | https://www.youtube.com/watch?v=OktWsTjs0Nw | - |
| 47 | Sistema Cardiovascular 5/6: Artérias Coronárias e Infarto Agudo do Miocárdio | Anatomia e etc. | https://www.youtube.com/watch?v=oGurYO1t-wU | - |
| 48 | Infarto Fulminante - Dr. Antonio Ghattas Parte 1/3 | https://www.youtube.com/watch?v=Irz3IetI_o8 | - |
| 49 | 💎 Infarto - Diego & Victor Hugo | Piano Tutorial 💎 | https://www.youtube.com/watch?v=-LcMwXhBGs4 | Vídeo irrelevante |
| 50 | INFARTO COM SUPRA DE ST | https://www.youtube.com/watch?v=OqaGnGCD0OI | - |
| 51 | Infarto - Diego e Victor Hugo Cover Fausto e Martim | https://www.youtube.com/watch?v=BhYSfM19yrg | Vídeo irrelevante |
| 52 | Infarto: Causas em pacientes jovens | https://www.youtube.com/watch?v=OtzjPzThCmw | - |
| 53 | Dor no Peito e Infarto. Chá de Emergência! 💖 REMÉDIO CASEIRO 268 | https://www.youtube.com/watch?v=vqoL7CQmHAM | Vídeo duplicado |
| 54 | Infarto e Parada Cardíaca são a mesma coisa? | https://www.youtube.com/watch?v=eXIwDq09Dq4 | - |
| 55 | Infarto | https://www.youtube.com/watch?v=S-akQOVVa5s | - |
| 56 | O dia antes do infarto | https://www.youtube.com/watch?v=3ejucj-DbiE | - |
| 57 | TRATAMENTO DO INFARTO - #007 | https://www.youtube.com/watch?v=ibNk-v_KUcg | - |
| 58 | Veja esta entrevista antes de ter um infarto | https://www.youtube.com/watch?v=SXvBnH_vX_w | - |
| 59 | Achava que era saudável, até que tive um infarto | Caixa-preta #28 | https://www.youtube.com/watch?v=9TzoDXnNcdk | - |
| 60 | Infarto - Diego & Victor Hugo / COMO TOCAR | https://www.youtube.com/watch?v=_OmmA1l89Ds | Vídeo irrelevante |
| 61 | Fisiopatologia do Infarto do Agudo do Miocárdio | https://www.youtube.com/watch?v=O3jfQBA7xgQ | - |
| 62 | Taco do Infarto | https://www.youtube.com/watch?v=UQM0kHbhxeU | Vídeo irrelevante |
| 63 | Qual a relação do infarto e da pressão alta? | https://www.youtube.com/watch?v=jGFMlSLRTVs | - |
| 64 | Infarto Agudo do Miocárdio: Como ele acontece? Existem formas de prevenir? | https://www.youtube.com/watch?v=SCl_EBBn-SY | - |
| 65 | TIVE UM INFARTO NA CADEIA | https://www.youtube.com/watch?v=6j7YpNYasRs | Vídeo irrelevante |
| 66 | 🔴INFARTO - XAND AVIÃO 2019 - (MUSICA NOVA | https://www.youtube.com/watch?v=U2kuCJESjQc | Vídeo irrelevante |
| 67 | Eletrocardiograma no infarto agudo do miocárdio - Parte 2 | https://www.youtube.com/watch?v=GB_cxUY8bkI | Vídeo duplicado |
| 68 | MINHA MÃE FINGIU TER UM INFARTO - TROLLAGEM ÉPICA 😱 ** trollagem ** | https://www.youtube.com/watch?v=E212Oey0f4s | Vídeo irrelevante |
| 69 | Vídeo Aula Acordeon Infarto -Diego & Victor Hugo - Pedrão Sanfoneiro | https://www.youtube.com/watch?v=xesCujFClDU | Vídeo irrelevante |
| 70 | Como tocar Infarto (Diego & Victor Hugo) Completa no violão - Aula de violão | https://www.youtube.com/watch?v=2a2SI7qol6c | Vídeo irrelevante |
| 71 | Fatores de risco para infarto | https://www.youtube.com/watch?v=vdvgbRbsVUQ | - |
| 72 | Infarto Agudo no Miocárdio - Tratamento I 7/10 | https://www.youtube.com/watch?v=bzMGUgTNiB0 | - |
| 73 | INFARTO - DESENTUPIR VEIAS - SINTOMAS CORACÃO | https://www.youtube.com/watch?v=qmNGXOdbGTs | - |
| 74 | Como prevenir o infarto? | https://www.youtube.com/watch?v=cEdwgAH57AM | - |
| 75 | 👉7 Sinais de Que Um INFARTO Está A CAMINHO ❤ Saiba O Que Fazer | https://www.youtube.com/watch?v=1JAeiRFYUEk | - |
| 76 | Cuidados de Enfermagem e Farmacológicos no Infarto Agudo do Miocárdio | https://www.youtube.com/watch?v=cLMLSZ1dIDU | - |
| 77 | CIFRA INFARTO (DIEGO & VICTOR HUGO) CIFRA SIMPLIFICADA NO VIOLÃO | https://www.youtube.com/watch?v=g2fci25LDdY | Vídeo irrelevante |
| 78 | Dimitre Lorran - INFARTO | https://www.youtube.com/watch?v=ug1wxLmSnEA | Vídeo irrelevante |
| 79 | IAM - Infarto Agudo do Miocárdio | https://www.youtube.com/watch?v=lSj15f7vUzw | - |
| 80 | ECG Fácil - Aula 11 - Infarto Agudo do Miocárdio | https://www.youtube.com/watch?v=NwLmxRvQw_A | - |
| 81 | Diego & Victor Hugo - Infarto ( DOWNLOAD + LETRA) | https://www.youtube.com/watch?v=k9TV9QlVot0 | Vídeo irrelevante |
| 82 | INFARTO - ZÉ SANFONEIRO E ZÉ FILHO | https://www.youtube.com/watch?v=LpSH_EODNqE | Vídeo irrelevante |
| 83 | Infarto Agudo al Miocardio - Salud - Educatina | https://www.youtube.com/watch?v=JbPbGxBvqJE | Vídeo irrelevante e língua espanhola |
| 84 | Quais os sintomas do infarto? O que devo fazer se desconfiar que estou tendo um? | https://www.youtube.com/watch?v=L8Lx1e50qCs | - |
| 85 | Doença arterial coronariana IV (Infarto com supradesnivelamento de ST) | CARDIOLOGIA | https://www.youtube.com/watch?v=p5HurF45YFA | - |
| 86 | Infarto - sintomas, causas, diagnóstico, tratamento e prevenção | https://www.youtube.com/watch?v=AwxW10FNwCI | - |
| 87 | 5 Fatores de Risco para o Infarto e o AVC | https://www.youtube.com/watch?v=RH7nO8uorKw | - |
| 88 | Prevenir infarto e fortalece seu coração | https://www.youtube.com/watch?v=4NWJXUC2y6g | - |
| 89 | 6 Sinais de que Você vai Sofrer um Infarto | https://www.youtube.com/watch?v=OQueHdch2hs | - |
| 90 | 11 reais fatores de risco para infarto e AVC! Conheça os verdadeiros vilões! | https://www.youtube.com/watch?v=DWNjQdFiDcY | - |
| 91 | Diego & Victor Hugo - Infarto (Vídeo Clipe ROMÂNTICO❤ ) | https://www.youtube.com/watch?v=7SyHgh6r3fc | Vídeo irrelevante |
| 92 | FUI TROLLAR MINHA MÃE E ELA *SOFREU UM INFARTO* ⚰ "ME DEI MAL" | https://www.youtube.com/watch?v=v7ooZPFnsJk | Vídeo irrelevante |
| 93 | Infarto Agudo do Miocárdio (Eletrocardiograma) | https://www.youtube.com/watch?v=2st6GtS_4eA | - |
| 94 | INFARTO - SINTOMAS, CAUSAS E TRATAMENTOS | https://www.youtube.com/watch?v=D5hfBvXdjyw | - |
| 95 | INFARTO - Diego & Victor Hugo (KARAOKÊ VERSION) | https://www.youtube.com/watch?v=4MuX2ygEp1s | Vídeo irrelevante |
| 96 | Qual a diferença entre angina e infarto? | https://www.youtube.com/watch?v=0lcixxyuHCs | - |
| 97 | Infarto | https://www.youtube.com/watch?v=_OBjrpDIDkA | Vídeo irrelevante |
| 98 | TIVE SINTOMAS DE INFARTO E CORRI PRO HOSPITAL! | https://www.youtube.com/watch?v=eZSOOrXU-f0 | Vídeo irrelevante |
| 99 | Previna-se do infarto -dieta e saúde - Rede Globo_New.flv | https://www.youtube.com/watch?v=CUg_rR--sAE | - |
| 100 | Saúde e Prevenção: Infarto Agudo do Miocárdio | https://www.youtube.com/watch?v=jI4ucLXUgXs | - |
| "enfarte + miocárdio" | 1 | Principais sinais de ATAQUE DO CORAÇÃO 🔴🔵 Uninove | https://www.youtube.com/watch?v=u_NEJwpnK0s | Vídeo duplicado |
| 2 | Para combater o enfarte do miocardio | https://www.youtube.com/watch?v=MZ3iTCNzpKY | Vídeo duplicado |
| 3 | Enfarte Agudo do Miocárdio | https://www.youtube.com/watch?v=Fp5RELZPCA8 | Vídeo duplicado |
| 4 | COMO ACONTECE UM INFARTO (ATAQUE CARDÍACO) - Dr. Marcelo Lima | https://www.youtube.com/watch?v=gYY-T8qnaXI | Vídeo duplicado |
| 5 | infarto do miocárdio como ocorre? Entenda o ataque cardíaco | https://www.youtube.com/watch?v=kqGVXAKOEF4 | Vídeo duplicado |
| 6 | Saúde: Enfarte do miocárdio - Praça da Alegria | https://www.youtube.com/watch?v=ZpU6fo3-3P4 | Vídeo duplicado |
| 7 | Enfarte Agudo do Miocárdio | https://www.youtube.com/watch?v=KUqWZI2Dr-8 | Vídeo duplicado |
| 8 | Enfarte do miocárdio | https://www.youtube.com/watch?v=-bFcULh08xc | Vídeo duplicado |
| 9 | STENT FOR LIFE: O enfarte não pode esperar | https://www.youtube.com/watch?v=5_QFlY9r41Y | Vídeo duplicado |
| 10 | Stent For Life - Seja mais rápido que um enfarte! | https://www.youtube.com/watch?v=xwWLG9yDtA4 | Vídeo duplicado |
| 11 | Infarto Agudo do Miocardio - Parte 2 | https://www.youtube.com/watch?v=cbndiwW65rU | Vídeo duplicado |
| 12 | 15 Alimentos Que Diminuem o Risco de Ataque Cardíaco | https://www.youtube.com/watch?v=mJ01ifKTiZI | Vídeo duplicado |
| 13 | Dr. Responde: 7 dores que não devem ser ignoradas | https://www.youtube.com/watch?v=doonyPjluFw | Vídeo irrelevante |
| 14 | 4 SINAIS QUE SEU CORPO DÁ ANTES DE UM INFARTO | Dr Dayan Siebra | https://www.youtube.com/watch?v=uJs2XlTgb_A&t=2s | Vídeo duplicado |
| 15 | Enfarte agudo do miocárdio | https://www.youtube.com/watch?v=T6Ea0THKJYg | Vídeo duplicado |
| 16 | José Carlos Malato sofreu um enfarte do miocárdio em 2013 | https://www.youtube.com/watch?v=7-ojaDOV-H0 | Vídeo duplicado |
| 17 | Insuficiência Cardíaca (ou coração inchado) | https://www.youtube.com/watch?v=3lB1EgcnqEo | Vídeo irrelevante |
| 18 | Cateterismo - Utilização para infarto agudo do miocárdio | https://www.youtube.com/watch?v=K6BFhUmyb6g | Vídeo duplicado |
| 19 | Infarto (ataque cardíaco) | Dicas de Saúde | https://www.youtube.com/watch?v=sEY_kS4fb-g | Vídeo duplicado |
| 20 | Infarto Agudo no Miocárdio | https://www.youtube.com/watch?v=EE0v4GWOPbU | Vídeo duplicado |
| 21 | Infarto: saiba como acontece um ataque cardíaco | https://www.youtube.com/watch?v=INag1QZJ-Pk | Vídeo duplicado |
| 22 | Enfarte Agudo Miocárdio | https://www.youtube.com/watch?v=QyUajeQixCI | Vídeo duplicado |
| 23 | Enfarte do miocárdio | https://www.youtube.com/watch?v=dqgecCDEWgY | Vídeo duplicado |
| 24 | Enfarte do Miocárdio - Reportagem no Centro Hospitalar de Setúbal | https://www.youtube.com/watch?v=OBG9i_F7PoE | Vídeo duplicado |
| 25 | Dr. Drauzio Varella explica como identificar e agir diante de um infarto | https://www.youtube.com/watch?v=QFSm6HhXU50 | Vídeo duplicado |
| 26 | O que é um enfarte do miocárdio? Por que se produz? | https://www.youtube.com/watch?v=Lxh4APWyuHs | Vídeo duplicado |
| 27 | Eletrocardiograma no infarto agudo do miocárdio - parte1 | https://www.youtube.com/watch?v=Psug0Bjx_gU | Vídeo duplicado |
| 28 | PACIENTE COM INFARTO AGUDO DO MIOCARDIO CHEGA NO B | https://www.youtube.com/watch?v=xXDP1oZzpkk | Vídeo duplicado |
| 29 | Impacto da reabilitação cardíaca após enfarte do miocárdio | https://www.youtube.com/watch?v=VmMjEDZgLIU | Vídeo duplicado |
| 30 | Testemunho do Padre Camões após ter sofrido um enfarte agudo do Miocárdio (Ataque Cardíaco) | https://www.youtube.com/watch?v=ALHwc6O9xxA | Vídeo duplicado |
| 31 | Stent For Life sensibiliza peregrinos para o enfarte agudo do miocárdio | https://www.youtube.com/watch?v=cn4JA3P0tD4 | Vídeo duplicado |
| 32 | GNR multa ambulância com equipa que socorria idosa com enfarte do miocárdio | https://www.youtube.com/watch?v=G3IK--S7QX0 | Vídeo duplicado |
| 33 | Morrem oito mil portugueses por ano com enfarte agudo do miocárdio | https://www.youtube.com/watch?v=ba2IQPbqqFM | Vídeo duplicado |
| 34 | Iker Casillas emocionado nas primeiras declarações depois de ter sofrido um enfarte do miocárdio | https://www.youtube.com/watch?v=31ye9Ubix28 | Vídeo duplicado |
| 35 | Enfarte agudo do miocárdio em choque cardiogénico: um caso clínico em destaque no Heart Failure 2019 | https://www.youtube.com/watch?v=AENOMXpUL44 | Vídeo duplicado |
| 36 | Como evitar a mortalidade por enfarte agudo do miocárdio em contexto hospitalar | https://www.youtube.com/watch?v=alyFj2do_-s | Vídeo duplicado |
| 37 | Enfarte nas Mulheres | https://www.youtube.com/watch?v=CSltN4o-7J0&list=PLZHEvVRTN208744SLdoyIfm9eej9zkhtY | Vídeo duplicado |
| 38 | Dia do Doente Coronário - Entrevista ao Dr. Pedro Farto e Abreu | https://www.youtube.com/watch?v=dIsxOr3yg-g&list=PLZHEvVRTN208744SLdoyIfm9eej9zkhtY&index=2 | Vídeo duplicado |
| 39 | Enfarte - Testemunho | https://www.youtube.com/watch?v=EOdeuQBOO_4&list=PLZHEvVRTN208744SLdoyIfm9eej9zkhtY&index=3 | Vídeo duplicado |
| 40 | Enfarte na Mulher - Entrevista ao Dr. Pedro Farto e Abreu | https://www.youtube.com/watch?v=7cke2SWRCRs&list=PLZHEvVRTN208744SLdoyIfm9eej9zkhtY&index=4 | Vídeo duplicado |
| 41 | Cada Segundo Conta | https://www.youtube.com/watch?v=k9AYmkja4LQ&list=PLZHEvVRTN208744SLdoyIfm9eej9zkhtY&index=5 | Vídeo duplicado |
| 42 | Entrevista RTP - Cada Segundo Conta | https://www.youtube.com/watch?v=ImwTLBr76MQ&list=PLZHEvVRTN208744SLdoyIfm9eej9zkhtY&index=6 | Vídeo duplicado |
| 43 | Entrevista Porto Canal - Cada Segundo Conta | https://www.youtube.com/watch?v=QQUrnEgn0EE&list=PLZHEvVRTN208744SLdoyIfm9eej9zkhtY&index=7 | Vídeo duplicado |
| 44 | Cada Segundo Conta - Serenella Andrade | https://www.youtube.com/watch?v=7K8hW2bC02g&list=PLZHEvVRTN208744SLdoyIfm9eej9zkhtY&index=8 | Vídeo duplicado |
| 45 | Entrevista SIC - Cada Segundo Conta | https://www.youtube.com/watch?v=1hIC60AmQt0&list=PLZHEvVRTN208744SLdoyIfm9eej9zkhtY&index=25 | Vídeo duplicado |
| 46 | Canal S+ - Cada Segundo Conta | https://www.youtube.com/watch?v=rsBLqHT-t7c&list=PLZHEvVRTN208744SLdoyIfm9eej9zkhtY&index=26 | Vídeo duplicado |
| 47 | Entrevista Porto Canal - Dra. Elisabete Jorge | https://www.youtube.com/watch?v=L5loh0OjLPU&list=PLZHEvVRTN208744SLdoyIfm9eej9zkhtY&index=27 | Vídeo duplicado |
| 48 | Cada Segundo Conta - TSF | https://www.youtube.com/watch?v=LFfl6BpDoGM&list=PLZHEvVRTN208744SLdoyIfm9eej9zkhtY&index=32 | - |
| 49 | Enfarte do Miocárdio - Aimorés MG. | https://www.youtube.com/watch?v=ckA2j2b8BVM | Vídeo duplicado |
| 50 | 30-07-2012 - TVI, Diário da Manhã - Enfarte Agudo do Miocárdio: cada minuto conta | https://www.youtube.com/watch?v=tkfT5wG4xok | Vídeo duplicado |
| 51 | ⭐️❤️Infarto feminino: 7 sintomas que costumam passar despercebidos | https://www.youtube.com/watch?v=vtU1G1haYws | Vídeo duplicado |
| 52 | Médicos explicam o que aconteceu a Iker Casillas | https://www.youtube.com/watch?v=9VFkCU-1kDc | Vídeo duplicado |
| 53 | Sobreviver a um enfarte | https://www.youtube.com/watch?v=vm8HRpW7aXk | Vídeo duplicado |
| 54 | HCorExplica - Sintomas do Infarto Agudo do Miocárdio | https://www.youtube.com/watch?v=uyEAf4ySBOw | Vídeo duplicado |
| 55 | "- A minha Veia tá entupida de COLESTEROL, como eu DESENTUPO?" 25/05 | https://www.youtube.com/watch?v=5D9Gr0qMXF8 | Vídeo duplicado |
| 56 | 10 Sinais Alarmantes De Que O Seu Coração Não Está Funcionando Direito | https://www.youtube.com/watch?v=cp172xNnRhk | Vídeo duplicado |
| 57 | Consultório Enfarte Agudo Miocárdio | https://www.youtube.com/watch?v=ViJ2DwaK0nQ | Vídeo duplicado |
| 58 | Nélson Puga: "O Iker Casillas está bem e estável" | https://www.youtube.com/watch?v=FdkZAJ8Ise4 | Vídeo duplicado |
| 59 | Enfarte Agudo do Miocárdio | https://www.youtube.com/watch?v=GhdzMxgbSaw | Vídeo duplicado |
| 60 | Morte por enfarte é mais provável nas mulheres por erro de diagnóstico | https://www.youtube.com/watch?v=IXPSzFvFeQ0 | Vídeo duplicado |
| 61 | Enfarte Agudo Miocárdio mp4 | https://www.youtube.com/watch?v=hwa-mHdq07o | Vídeo duplicado |
| 62 | M4 - Enfarte do miocárdio prévio: que fármacos utilizar e que valores-alvo devemos alcançar? | https://www.youtube.com/watch?v=lROHnFqEyv8 | - |
| 63 | Pesquisa mostra Falta de perdão aumenta chance de infarto! | https://www.youtube.com/watch?v=1aqYTf1rnrs | - |
| 64 | Cardiologista diz que "quase de certeza absoluta que Casillas vai ficar bem" | https://www.youtube.com/watch?v=CLAp0JXeJs8 | Vídeo duplicado |
| 65 | Fisiopatologia do Infarto do Agudo do Miocárdio | https://www.youtube.com/watch?v=O3jfQBA7xgQ | Vídeo duplicado |
| 66 | 22-02-2012 - SIC, Primeiro Jornal - Reconhecer um Enfarte | https://www.youtube.com/watch?v=v0FFlWihLHI | Vídeo duplicado |
| 67 | O vídeo de Casillas "emocionado" com mensagens de apoio após enfarte | https://www.youtube.com/watch?v=bUjWRvVzxSs | Vídeo duplicado |
| 68 | VoxPop | O que sabem as pessoas sobre o enfarte? | https://www.youtube.com/watch?v=xAQM0_fEioo | Vídeo duplicado |
| 69 | O que é infarto | https://www.youtube.com/watch?v=tyTHhgU-nEs&t=32s | Vídeo duplicado |
| 70 | Infarto do Miocárdio 29/04/2014- Dr. Antonio Ghattas | https://www.youtube.com/watch?v=gHf6XjpSTGo | Vídeo duplicado |
| 71 | 10 dicas para prevenir o infarto | IMEB | https://www.youtube.com/watch?v=Se5ve-Q_VV0 | Vídeo duplicado |
| 72 | Reportagem | Stent for Life sensibiliza peregrinos para o enfarte | https://www.youtube.com/watch?v=LmLM0aKLnMM | Vídeo duplicado |
| 73 | Anatomia Patológica - Enfarte do miocárdio ampliada | https://www.youtube.com/watch?v=KJ4ijxw9mF0 | Vídeo duplicado |
| 74 | Anatomia Patológica - Enfarte do miocárdio | https://www.youtube.com/watch?v=a1kyIbbCgLo | Vídeo duplicado |
| 75 | É possível ter vida saudável após infarto | https://www.youtube.com/watch?v=OK9e9QlhSqk | Vídeo duplicado |
| 76 | Goleiro Casillas sofre infarto | https://www.youtube.com/watch?v=Zy9c_RIN904 | Vídeo irrelevante |
| 77 | Simbody - Enfarte (Versão PT) | https://www.youtube.com/watch?v=EDhHbUM8qa4 | Vídeo duplicado |
| 78 | Infarto, enfarto, infarte ou enfarte? | https://www.youtube.com/watch?v=vhTgk5pj6XE | Vídeo duplicado |
| 79 | Infarto do Miocárdio - Primeiro atendimento. | https://www.youtube.com/watch?v=wt5HGT4yznA | - |
| 80 | Sara Carbonero quebra silêncio sobre o enfarte de Iker Casillas | https://www.youtube.com/watch?v=3vKsLViZi5M | Vídeo duplicado |
| 81 | Infarto Fulminante: entenda sintomas, tratamento e como evitar | https://www.youtube.com/watch?v=m7986KvntOo | Vídeo duplicado |
| 82 | Infarto Agudo do Miocárdio: Como ele acontece? Existem formas de prevenir? | https://www.youtube.com/watch?v=SCl_EBBn-SY | Vídeo duplicado |
| 83 | Angina do peito – Angina Pectoris - Dr. Antonio Ghattas | https://www.youtube.com/watch?v=Bof0OGzQ-tk | - |
| 84 | Infarto Fulminante - Dr. Antonio Ghattas Parte 1/3 | https://www.youtube.com/watch?v=Irz3IetI_o8 | Vídeo duplicado |
| 85 | Saia da ROTA do Infarto e do AVC - Com Dr Lair Ribeiro - CORAÇÃO ANTI-INFARTO | https://www.youtube.com/watch?v=BZvI0tFvt-I&t=51s | Vídeo duplicado |
| 86 | Futuro profissional de Casillas em risco | https://www.youtube.com/watch?v=0ZxZ49C7Mlo | Vídeo irrelevante |
| 87 | Óleo de coco é recomendado por Lair Ribeiro | https://www.youtube.com/watch?v=kIHZsI0nBMs | - |
| 88 | Médico especialista diz que ataque cardíaco foi o fim para Casillas: «Não jogará mais» | https://www.youtube.com/watch?v=mL57QntOrYI | Vídeo irrelevante |
| 89 | Doença Coronária_RTP1 – Portugal em Direto, 11-02-2015 | https://www.youtube.com/watch?v=4LBu-ysFoks | Vídeo irrelevante |
| 90 | Cura e libertação instantânea de enfarto do miocárdio e vício de cigarros-Ap.Onório | https://www.youtube.com/watch?v=PKuiQhgxZaE | Vídeo irrelevante |
| 91 | Infarto - sintomas, causas, diagnóstico, tratamento e prevenção | https://www.youtube.com/watch?v=AwxW10FNwCI | Vídeo duplicado |
| 92 | Minuto de Saúde - Enfarte do Miocárdio | https://www.youtube.com/watch?v=UMHPUkiTtOQ | - |
| 93 | INFARTO COM SUPRA DE ST | https://www.youtube.com/watch?v=OqaGnGCD0OI | Vídeo duplicado |
| 94 | Infarto do Miocárdio - Ser Saudável | https://www.youtube.com/watch?v=yfvSnraAE-0 | Vídeo duplicado |
| 95 | SINTOMAS DE INFARTO | https://www.youtube.com/watch?v=zaWzeMLcPjU | Vídeo duplicado |
| 96 | Enfarte do Miocárdio | https://www.youtube.com/watch?v=aDERjLERw6I | Vídeo duplicado |
| 97 | ESTUDO ASSOCIA ENFARTE À FALTA DE PERDÃO | Jornal Nova Era (26/06/2019) | https://www.youtube.com/watch?v=HJ3zHBmR0vI | Vídeo duplicado |
| 98 | Iker Casillas recebe mensagens de apoio do mundo do futebol | https://www.youtube.com/watch?v=LP8OPIX_4ow | Vídeo irrelevante |
| 99 | Depois do susto do enfarte e do cancro de Sara Carbonero, Iker Casillas faz as pazes com os pais | https://www.youtube.com/watch?v=GZVG3qA7o6c | Vídeo irrelevante |
| 100 | Infarto do miocárdio | https://www.youtube.com/watch?v=fuAyNB13oL4 | Vídeo duplicado |
| "enfarte + agudo + miocárdio" | 1 | COMO ACONTECE UM INFARTO (ATAQUE CARDÍACO) - Dr. Marcelo Lima | https://www.youtube.com/watch?v=gYY-T8qnaXI | Vídeo duplicado |
| 2 | Enfarte Agudo do Miocárdio | https://www.youtube.com/watch?v=KUqWZI2Dr-8 | Vídeo duplicado |
| 3 | Enfarte Agudo do Miocárdio | https://www.youtube.com/watch?v=Fp5RELZPCA8 | - |
| 4 | infarto do miocárdio como ocorre? Entenda o ataque cardíaco | https://www.youtube.com/watch?v=kqGVXAKOEF4 | Vídeo duplicado |
| 5 | Enfarte Agudo Miocárdio | https://www.youtube.com/watch?v=QyUajeQixCI | Vídeo duplicado |
| 6 | Infarto Agudo do Miocardio - Parte 1 | https://www.youtube.com/watch?v=zFlahOXu3Lk | Vídeo duplicado |
| 7 | Principais sinais de ATAQUE DO CORAÇÃO 🔴🔵 Uninove | https://www.youtube.com/watch?v=u_NEJwpnK0s | Vídeo duplicado |
| 8 | STENT FOR LIFE: O enfarte não pode esperar | https://www.youtube.com/watch?v=5_QFlY9r41Y | Vídeo duplicado |
| 9 | Infarto (ataque cardíaco) | Dicas de Saúde | https://www.youtube.com/watch?v=sEY_kS4fb-g | Vídeo duplicado |
| 10 | Stent For Life - Seja mais rápido que um enfarte! | https://www.youtube.com/watch?v=xwWLG9yDtA4 | - |
| 11 | Para combater o enfarte do miocardio | https://www.youtube.com/watch?v=MZ3iTCNzpKY | - |
| 12 | Infarto Agudo no Miocárdio | https://www.youtube.com/watch?v=EE0v4GWOPbU | - |
| 13 | Enfarte do miocárdio | https://www.youtube.com/watch?v=-bFcULh08xc | Vídeo duplicado |
| 14 | Infarto Agudo do Miocardio - Parte 2 | https://www.youtube.com/watch?v=cbndiwW65rU | Vídeo duplicado |
| 15 | Dr. Drauzio Varella explica como identificar e agir diante de um infarto | https://www.youtube.com/watch?v=QFSm6HhXU50 | Vídeo duplicado |
| 16 | Eletrocardiograma no infarto agudo do miocárdio - parte1 | https://www.youtube.com/watch?v=Psug0Bjx_gU | - |
| 17 | Enfarte agudo do miocárdio | https://www.youtube.com/watch?v=T6Ea0THKJYg | Vídeo duplicado |
| 18 | HCorExplica - Sintomas do Infarto Agudo do Miocárdio | https://www.youtube.com/watch?v=uyEAf4ySBOw | Vídeo duplicado |
| 19 | Infarto: saiba como acontece um ataque cardíaco | https://www.youtube.com/watch?v=INag1QZJ-Pk | Vídeo duplicado |
| 20 | Saúde: Enfarte do miocárdio - Praça da Alegria | https://www.youtube.com/watch?v=ZpU6fo3-3P4 | - |
| 21 | Testemunho do Padre Camões após ter sofrido um enfarte agudo do Miocárdio (Ataque Cardíaco) | https://www.youtube.com/watch?v=ALHwc6O9xxA | Vídeo irrelevante |
| 22 | 10 Sinais Alarmantes De Que O Seu Coração Não Está Funcionando Direito | https://www.youtube.com/watch?v=cp172xNnRhk | Vídeo duplicado |
| 23 | "- A minha Veia tá entupida de COLESTEROL, como eu DESENTUPO?" 25/05 | https://www.youtube.com/watch?v=5D9Gr0qMXF8 | - |
| 24 | 15 Alimentos Que Diminuem o Risco de Ataque Cardíaco | https://www.youtube.com/watch?v=mJ01ifKTiZI | Vídeo duplicado |
| 25 | Consultório Enfarte Agudo Miocárdio | https://www.youtube.com/watch?v=ViJ2DwaK0nQ | - |
| 26 | Infarto Agudo do Miocárdio: Como ele acontece? Existem formas de prevenir? | https://www.youtube.com/watch?v=SCl_EBBn-SY | - |
| 27 | Enfarte Agudo Miocárdio mp4 | https://www.youtube.com/watch?v=hwa-mHdq07o | Vídeo duplicado |
| 28 | Stent For Life sensibiliza peregrinos para o enfarte agudo do miocárdi | https://www.youtube.com/watch?v=cn4JA3P0tD4 | - |
| 29 | Morrem oito mil portugueses por ano com enfarte agudo do miocárdio | https://www.youtube.com/watch?v=ba2IQPbqqFM | Vídeo duplicado |
| 30 | Fisiopatologia do Infarto do Agudo do Miocárdio | https://www.youtube.com/watch?v=O3jfQBA7xgQ | Vídeo duplicado |
| 31 | SINTOMAS DE INFARTO | https://www.youtube.com/watch?v=zaWzeMLcPjU | - |
| 32 | 30-07-2012 - TVI, Diário da Manhã - Enfarte Agudo do Miocárdio: cada minuto conta | https://www.youtube.com/watch?v=tkfT5wG4xok | - |
| 33 | Como evitar a mortalidade por enfarte agudo do miocárdio em contexto hospitalar | https://www.youtube.com/watch?v=alyFj2do_-s | Vídeo duplicado |
| 34 | Cateterismo - Utilização para infarto agudo do miocárdio | https://www.youtube.com/watch?v=K6BFhUmyb6g | - |
| 35 | Enfarte agudo do miocárdio em choque cardiogénico: um caso clínico em destaque no Heart Failure 2019 | https://www.youtube.com/watch?v=AENOMXpUL44 | Vídeo duplicado |
| 36 | Eletrocardiograma no infarto agudo do miocárdio - Parte 2 | https://www.youtube.com/watch?v=GB_cxUY8bkI | Vídeo duplicado |
| 37 | Sistema Cardiovascular 5/6: Artérias Coronárias e Infarto Agudo do Miocárdio | Anatomia e etc. | https://www.youtube.com/watch?v=oGurYO1t-wU | Vídeo duplicado |
| 38 | Impacto da reabilitação cardíaca após enfarte do miocárdio | https://www.youtube.com/watch?v=VmMjEDZgLIU | Vídeo duplicado |
| 39 | O que é infarto | https://www.youtube.com/watch?v=tyTHhgU-nEs | - |
| 40 | Sobreviver a um enfarte | https://www.youtube.com/watch?v=vm8HRpW7aXk | Vídeo duplicado |
| 41 | Cardiologista diz que "quase de certeza absoluta que Casillas vai ficar bem" | https://www.youtube.com/watch?v=CLAp0JXeJs8 | Vídeo duplicado |
| 42 | 1 - Enfarte Agudo do Miocárdio - SBV para Crianças | https://www.youtube.com/watch?v=TDcTREk_Lh0 | Vídeo duplicado |
| 43 | PACIENTE COM INFARTO AGUDO DO MIOCARDIO CHEGA NO B | https://www.youtube.com/watch?v=xXDP1oZzpkk | - |
| 44 | ⭐️❤️Infarto feminino: 7 sintomas que costumam passar despercebidos | https://www.youtube.com/watch?v=vtU1G1haYws | Vídeo duplicado |
| 45 | Infarto do miocárdio | https://www.youtube.com/watch?v=fuAyNB13oL4 | - |
| 46 | 22-02-2012 - SIC, Primeiro Jornal - Reconhecer um Enfarte | https://www.youtube.com/watch?v=v0FFlWihLHI | - |
| 47 | INFARTO COM SUPRA DE ST | https://www.youtube.com/watch?v=OqaGnGCD0OI | Vídeo duplicado |
| 48 | Infarto - sintomas, causas, diagnóstico, tratamento e prevenção | https://www.youtube.com/watch?v=AwxW10FNwCI | Vídeo duplicado |
| 49 | Enfarte Agudo do Miocárdio | https://www.youtube.com/watch?v=GhdzMxgbSaw | Vídeo duplicado |
| 50 | Enfarte do miocárdio | https://www.youtube.com/watch?v=dqgecCDEWgY | Vídeo duplicado |
| 51 | Saia da ROTA do Infarto e do AVC - Com Dr Lair Ribeiro - CORAÇÃO ANTI-INFARTO | https://www.youtube.com/watch?v=BZvI0tFvt-I | - |
| 52 | Enfarte do Miocárdio - Aimorés MG. | https://www.youtube.com/watch?v=ckA2j2b8BVM | - |
| 53 | Programa Saúde Vida - assunto de hoje infarto agudo do miocárdio | https://www.youtube.com/watch?v=q9OfP7XXKmg | - |
| 54 | Infarto Fulminante: entenda sintomas, tratamento e como evitar | https://www.youtube.com/watch?v=m7986KvntOo | Vídeo duplicado |
| 55 | José Carlos Malato sofreu um enfarte do miocárdio em 2013 | https://www.youtube.com/watch?v=7-ojaDOV-H0 | Vídeo duplicado |
| 56 | Infarto Fulminante - Dr. Antonio Ghattas Parte 1/ | https://www.youtube.com/watch?v=Irz3IetI_o8 | Vídeo duplicado |
| 57 | Enfarte nas Mulheres | https://www.youtube.com/watch?v=Xbe3RQIU79U | - |
| 58 | DR. RAUL D'AUREA MORA JR. - INFARTO AGUDO DO MIOCÁRDIO | https://www.youtube.com/watch?v=7nh0DCa83GY | - |
| 59 | INFARTO DO MIOCÁRDIO - CORPO E SAÚDE - WWW.ARTEDEVIVER.COM | https://www.youtube.com/watch?v=9lSu5LxZNqc | - |
| 60 | 10 dicas para prevenir o infarto | IMEB | https://www.youtube.com/watch?v=Se5ve-Q_VV0 | Vídeo duplicado |
| 61 | Reportagem | Stent for Life sensibiliza peregrinos para o enfarte | https://www.youtube.com/watch?v=LmLM0aKLnMM | Vídeo duplicado |
| 62 | VoxPop | O que sabem as pessoas sobre o enfarte? | https://www.youtube.com/watch?v=xAQM0_fEioo | Vídeo duplicado |
| 63 | Enfarte Agudo do Miocárdio | https://www.youtube.com/watch?v=E1vHI1wpF7Y | Vídeo duplicado |
| 64 | Infarto do Miocárdio - Ser Saudável | https://www.youtube.com/watch?v=yfvSnraAE-0 | - |
| 65 | Fique atento para os sintomas do infarto do miocárdi0 | https://www.youtube.com/watch?v=IY_cil3_yOk | - |
| 66 | O vídeo de Casillas "emocionado" com mensagens de apoio após enfarte | https://www.youtube.com/watch?v=bUjWRvVzxSs | Vídeo duplicado |
| 67 | Infarto do Miocárdio - Ataque cardíaco: explicado pela cardiologista Dra. Marisa Amato | https://www.youtube.com/watch?v=5W_GDMAeDBw | - |
| 68 | É possível ter vida saudável após infarto | https://www.youtube.com/watch?v=OK9e9QlhSqk | - |
| 69 | Nélson Puga: "O Iker Casillas está bem e estável" | https://www.youtube.com/watch?v=FdkZAJ8Ise4 | Vídeo irrelevante |
| 70 | 12 SINAIS DE ATAQUE CARDIACO,CORAÇÃO,ENFARTO MIOCARDIO | https://www.youtube.com/watch?v=7tV9gUs4hn0 | - |
| 71 | Características de un Infarto Agudo al Miocardio | https://www.youtube.com/watch?v=XehQsINIJfc | Língua espanhola |
| 72 | Infarto Agudo do Miocárdio | https://www.youtube.com/watch?v=CcZJRXMwx5g | - |
| 73 | Resolução da questão UEPA -2012 - Probabilidade 09 | https://www.youtube.com/watch?v=ifSyw-oUjAM | Vídeo irrelevante |
| 74 | Morte por enfarte é mais provável nas mulheres por erro de diagnóstico | https://www.youtube.com/watch?v=IXPSzFvFeQ0 | Vídeo duplicado |
| 75 | Estratégias de revascularização no contexto do EAM e insuficiência cardíaca aguda | https://www.youtube.com/watch?v=eACizfpFmK0 | - |
| 76 | Fatores de Risco Cardiovascular | https://www.youtube.com/watch?v=EzuWq1Zw0mg | - |
| 77 | GNR multa ambulância com equipa que socorria idosa com enfarte do miocárdio | https://www.youtube.com/watch?v=G3IK--S7QX0 | Vídeo duplicado |
| 78 | O que é um ataque cardíaco? | https://www.youtube.com/watch?v=9ap0DYsZQJA | - |
| 79 | Você Sabe o Que é Um Pré-Infarto? Conheça os Sintomas que Podem Salvar Sua Vida| Dicas de Saúde | https://www.youtube.com/watch?v=6loUBgrJzDI | - |
| 80 | Anatomia Patológica - Enfarte do miocárdio | https://www.youtube.com/watch?v=a1kyIbbCgLo | Vídeo duplicado |
| 81 | Sintomas do Infarto | https://www.youtube.com/watch?v=bEfgmxZkpBw | - |
| 82 | Infarto, enfarto, infarte ou enfarte? | https://www.youtube.com/watch?v=vhTgk5pj6XE | Vídeo duplicado |
| 83 | O que é um enfarte do miocárdio? Por que se produz? | https://www.youtube.com/watch?v=Lxh4APWyuHs | Vídeo duplicado |
| 84 | Casillas diz sentir-se bem e assume que futuro desportivo é uma incógnita | https://www.youtube.com/watch?v=L-TookOZOKQ | Vídeo irrelevante |
| 85 | Simbody - Enfarte (Versão PT | https://www.youtube.com/watch?v=EDhHbUM8qa4 | - |
| 86 | ESTUDO ASSOCIA ENFARTE À FALTA DE PERDÃO | Jornal Nova Era (26/06/2019) | https://www.youtube.com/watch?v=HJ3zHBmR0vI | Vídeo irrelevante |
| 87 | Las 5 claves del tratamiento de Casillas tras su infarto, al detalle | Diario AS | https://www.youtube.com/watch?v=_dDaWXvy8qQ | Vídeo irrelevante e língua espanhola |
| 88 | BEIRA TV: Mês do coração na ESALD | https://www.youtube.com/watch?v=vsive0AkoEY | Vídeo irrelevante |
| 89 | Infarto do Miocárdio 29/04/2014- Dr. Antonio Ghattas | https://www.youtube.com/watch?v=gHf6XjpSTGo | - |
| 90 | 6 SINAIS QUE O CORPO DÁ, SEMANAS ANTES DE UM INFARTO | https://www.youtube.com/watch?v=iGW_1oPMDkM | - |
| 91 | Dr. Lair Ribeiro fala sobre Infarto e AVC | https://www.youtube.com/watch?v=J5-hUj8jh1Q | Vídeo duplicado |
| 92 | Enfarte do Miocárdio | https://www.youtube.com/watch?v=aDERjLERw6I | - |
| 93 | INEM na Praça da Alegria | https://www.youtube.com/watch?v=0ytnhn4rcg0 | - |
| 94 | Doença renal crónica aumenta o risco de morte por doença cardiovascular | Bra News | https://www.youtube.com/watch?v=Vu62jx6c8Xk | Vídeo irrelevante |
| 95 | Enfarte Agudo do Miocárdio | https://www.youtube.com/watch?v=RbhYomtKR60 | Vídeo duplicado |
| 96 | Artigo recomendado do mês de Maio | https://www.youtube.com/watch?v=t4_HvOtyUbQ | Vídeo irrelevante |
| 97 | Enfarte do Miocárdio - Reportagem no Centro Hospitalar de Setúbal | https://www.youtube.com/watch?v=OBG9i_F7PoE | Vídeo duplicado |
| 98 | Isquemia do Miocárdio | https://www.youtube.com/watch?v=079Q2d7d7eI | - |
| 99 | Iker Casillas internado de urgência após sofrer enfarte agudo do miocárdio | https://www.youtube.com/watch?v=TkNkOrQLHo4 | Vídeo duplicado |
| 100 | Revascularizaçao do miocárdio | https://www.youtube.com/watch?v=2shm2rxFynY | - |
| "infarto + miocárdio" | 1 | infarto do miocárdio como ocorre? Entenda o ataque cardíaco | https://www.youtube.com/watch?v=kqGVXAKOEF4 | Vídeo duplicado |
| 2 | Dr. Drauzio Varella explica como identificar e agir diante de um infarto. | https://www.youtube.com/watch?v=QFSm6HhXU50 | Vídeo duplicado |
| 3 | Isquemia e Infarto - Resumo - Patologia Geral | https://www.youtube.com/watch?v=NM2ji-fpCZU | Vídeo duplicado |
| 4 | INFARTO AGUDO DO MIOCÁRDIO | SÉRIE SAÚDE BRASIL | https://www.youtube.com/watch?v=LGxD1lffW7w | Vídeo duplicado |
| 5 | Infarto do Miocárdio – causas, sintomas e tratamento | https://www.youtube.com/watch?v=w68dX5jvEFA | Vídeo duplicado |
| 6 | Sistema Cardiovascular 5/6: Artérias Coronárias e Infarto Agudo do Miocárdio | Anatomia e etc. | https://www.youtube.com/watch?v=oGurYO1t-wU | Vídeo duplicado |
| 7 | COMO ACONTECE UM INFARTO (ATAQUE CARDÍACO) - Dr. Marcelo Lima | https://www.youtube.com/watch?v=gYY-T8qnaXI | Vídeo duplicado |
| 8 | O que é infarto | https://www.youtube.com/watch?v=tyTHhgU-nEs | Vídeo duplicado |
| 9 | HCorExplica - Sintomas do Infarto Agudo do Miocárdio | https://www.youtube.com/watch?v=uyEAf4ySBOw | Vídeo duplicado |
| 10 | Principais sinais de ATAQUE DO CORAÇÃO 🔴🔵 Uninove | https://www.youtube.com/watch?v=u_NEJwpnK0s | Vídeo duplicado |
| 11 | Doenças do Coração, Artérias e Veias - Patologias do Sistema Cardiovascular - VideoAula 065 | https://www.youtube.com/watch?v=DVAXNIy-XrI | Vídeo duplicado |
| 12 | IAM - Infarto Agudo do Miocárdio | https://www.youtube.com/watch?v=lSj15f7vUzw | Vídeo duplicado |
| 13 | Infarto Fulminante: entenda sintomas, tratamento e como evitar | https://www.youtube.com/watch?v=m7986KvntOo | Vídeo duplicado |
| 14 | Ataque Cardíaco Devido a Aterosclerose | https://www.youtube.com/watch?v=5qG-K546AJM | - |
| 15 | Infarto al Miocardio | https://www.youtube.com/watch?v=A9C7UC0FQqA | Vídeo duplicado |
| 16 | Infarto de miocardio, ¿que lo produce?¿síntomas?¿cómo evitarlo? | https://www.youtube.com/watch?v=GTq-Hqs2eiM | Língua espanhola |
| 17 | Infarto Agudo do Miocardio - Parte 1 | https://www.youtube.com/watch?v=zFlahOXu3Lk | Vídeo duplicado |
| 18 | Cómo detectar un INFARTO AGUDO DE MIOCARDIO. Síntomas y signos principales. | https://www.youtube.com/watch?v=Zv29R6ZS0OE | Vídeo duplicado |
| 19 | Así se produce un infarto de miocardio | https://www.youtube.com/watch?v=r06y8AkfHEk | Vídeo duplicado |
| 20 | Infarto del Miocardio | https://www.youtube.com/watch?v=RZWnkU7p5Ow | Vídeo duplicado |
| 21 | Para combatir el infarto de miocardio | https://www.youtube.com/watch?v=X9iHgh-9Fpc | Vídeo duplicado |
| 22 | Infarto agudo de miocardio: Elevación o no del ST | https://www.youtube.com/watch?v=6w5Io4ljerI | Língua espanhola |
| 23 | Infarto: saiba como acontece um ataque cardíaco | https://www.youtube.com/watch?v=INag1QZJ-Pk | Vídeo duplicado |
| 24 | Infarto Agudo do Miocardio - Parte 2 | https://www.youtube.com/watch?v=cbndiwW65rU | Vídeo duplicado |
| 25 | Infarto de miocardio: síntomas y prevención | https://www.youtube.com/watch?v=6LMZDeR_XtQ | Língua espanhola |
| 26 | Signos de alarma en infarto agudo del miocardio | https://www.youtube.com/watch?v=KBSq7KJiwmA | Língua espanhola |
| 27 | Infarto agudo al miocardio | https://www.youtube.com/watch?v=69Qs4YSdHxA | Vídeo duplicado |
| 28 | IAM - Infarto Agudo do Miocárdio | https://www.youtube.com/watch?v=lSj15f7vUzw | Vídeo duplicado |
| 29 | Infarto agudo al miocardio | https://www.youtube.com/watch?v=Jom5_uHmxFk | Língua espanhola |
| 30 | Infarto agudo de Miocardio | https://www.youtube.com/watch?v=7PG7IvrjQK4 | Vídeo duplicado |
| 31 | Testimonios pacientes-Infarto de miocardio | https://www.youtube.com/watch?v=Tv-o3O_hHLw | Vídeo duplicado |
| 32 | QUANDO SURGIU O INFARTO AGUDO DO MIOCÁRDIO? | https://www.youtube.com/watch?v=iV-6_WdkyYE | Vídeo duplicado |
| 33 | Você sabe como ocorre o Infarto Agudo do Miocárdio? | https://www.youtube.com/watch?v=BY4KWJzVd74 | Vídeo duplicado |
| 34 | Fisiopatologia do Infarto do Agudo do Miocárdio | https://www.youtube.com/watch?v=O3jfQBA7xgQ | Vídeo duplicado |
| 35 | Per combattere l'infarto miocardico | https://www.youtube.com/watch?v=I2sIWQxzUck | Língua italiana |
| 36 | Infarto Agudo al Miocardio IAM - Fisioterapia | https://www.youtube.com/watch?v=vCu6iFhCNUk | Vídeo duplicado |
| 37 | Infarto no miocárdio x Tabagismo - Saúde - Mulheres (20/05/16) | https://www.youtube.com/watch?v=EGhBQa_UJUc | - |
| 38 | ¿Qué es un infarto de miocardio y por qué se produce? #telodigodecorazón | https://www.youtube.com/watch?v=3gQ3wHwxb8Y | Vídeo duplicado |
| 39 | Infarto do Miocárdio - Primeiro atendimento. | https://www.youtube.com/watch?v=wt5HGT4yznA | Vídeo duplicado |
| 40 | Eletrocardiograma no infarto agudo do miocárdio - parte1 | https://www.youtube.com/watch?v=Psug0Bjx_gU | Vídeo duplicado |
| 41 | ECG Fácil - Aula 11 - Infarto Agudo do Miocárdio | https://www.youtube.com/watch?v=NwLmxRvQw_A | Vídeo duplicado |
| 42 | Testimonios pacientes-Infarto de miocardio | https://www.youtube.com/watch?v=OyqOzi-aD4Q | Língua espanhola |
| 43 | Infarto Agudo no Miocárdio - Tratamento I 7/10 | https://www.youtube.com/watch?v=bzMGUgTNiB0 | Vídeo duplicado |
| 44 | Cirurgia de Revascularização do Miocárdio (CRM) | https://www.youtube.com/watch?v=wD5GO2rs36Y | Vídeo duplicado |
| 45 | Entrevista sobre infarto do miocárdio no público jovem - 19/02/2016 | https://www.youtube.com/watch?v=fWa1GDt1ttQ | - |
| 46 | Eletrocardiograma no infarto agudo do miocárdio - Parte 2 | https://www.youtube.com/watch?v=GB_cxUY8bkI | Vídeo duplicado |
| 47 | Infarto Agudo al Miocardio al ECG | https://www.youtube.com/watch?v=vE1-shiLxv0 | Vídeo duplicado |
| 48 | Infarto Agudo no Miocárdio - Fisiopatologia I 2/10 | https://www.youtube.com/watch?v=CNnp4YK5_Hs | Vídeo duplicado |
| 49 | Infarto localización en el ECG | https://www.youtube.com/watch?v=JdVdDNf5-mc | Vídeo duplicado |
| 50 | INFARTO AGUDO DO MIOCÁRDIO - RESUMO | PARTE 01 | https://www.youtube.com/watch?v=bAAZsmu8DTI | Vídeo duplicado |
| 51 | Infarto Agudo al Miocardio | https://www.youtube.com/watch?v=Uy-vT0m2dak | Vídeo duplicado |
| 52 | Infarto Agudo do Miocárdio com supra de St - Manole Educação | https://www.youtube.com/watch?v=USGO1cWYKXA | Vídeo duplicado |
| 53 | Infarto Agudo no Miocárdio - Diagnostico II 6/10 | https://www.youtube.com/watch?v=d_TwrQxqGno | Vídeo duplicado |
| 54 | <https://www.youtube.com/watch?v=d_TwrQxqGno> | https://www.youtube.com/watch?v=SCl_EBBn-SY | Vídeo duplicado |
| 55 | Infarto agudo de miocardio - Electrocardiograma curso de interpretación del ECG | https://www.youtube.com/watch?v=d0JG929IzHs | Vídeo duplicado |
| 56 | Infarto Agudo do Miocárdio Parte 1 - Angina Estável | https://www.youtube.com/watch?v=a1zbLbPzf3s | Vídeo duplicado |
| 57 | Saúde e Prevenção: Infarto Agudo do Miocárdio | https://www.youtube.com/watch?v=jI4ucLXUgXs | Vídeo duplicado |
| 58 | Cuidados de Enfermagem e Farmacológicos no Infarto Agudo do Miocárdio | https://www.youtube.com/watch?v=cLMLSZ1dIDU | Vídeo duplicado |
| 59 | Infarto Agudo no Miocárdio | https://www.youtube.com/watch?v=EE0v4GWOPbU | Vídeo duplicado |
| 60 | Infarto de miocardio | https://www.youtube.com/watch?v=GwjsLwn26Hk | Vídeo duplicado |
| 61 | Infarto Agudo do Miocárdio - Tratamento Farmacológico do IAM -- Aula Completa | https://www.youtube.com/watch?v=ZaVxq_1rBcM | Vídeo duplicado |
| 62 | infarto agudo do miocárdio | https://www.youtube.com/watch?v=EGcgP9P5ncI | Vídeo duplicado |
| 63 | Infarto de miocardio: ¿Por qué se produce y cuáles son sus síntomas? | https://www.youtube.com/watch?v=CEuEkKA_XKI | Língua espanhola |
| 64 | Infarto do miocárdio | https://www.youtube.com/watch?v=fuAyNB13oL4 | Vídeo duplicado |
| 65 | PACIENTE COM INFARTO AGUDO DO MIOCARDIO CHEGA NO B | https://www.youtube.com/watch?v=xXDP1oZzpkk | Vídeo duplicado |
| 66 | ¿Qué puedo hacer para prevenir un infarto agudo al miocardio? | https://www.youtube.com/watch?v=gnO9n2h8lok | Vídeo duplicado |
| 67 | Simulador infarto agudo al miocardio | https://www.youtube.com/watch?v=eiKX4wVMx-I | Vídeo irrelevante e língua espanhola |
| 68 | Qué es un infarto agudo de miocardio | https://www.youtube.com/watch?v=4n670Jl_Ekc | Língua espanhola |
| 69 | Tratamiento del infarto agudo de miocardio | https://www.youtube.com/watch?v=_NOVZXUeY8A | Vídeo duplicado |
| 70 | Infarto do Miocárdio - Ser Saudável | https://www.youtube.com/watch?v=yfvSnraAE-0 | Vídeo duplicado |
| 71 | Infarto de miocardio Mira la vida | https://www.youtube.com/watch?v=vzuFh3bRlrI | Língua espanhola |
| 72 | Infarto Agudo do Miocárdio - Tratamento Farmacológico do IAM -- Aula Completa | https://www.youtube.com/watch?v=ZaVxq_1rBcM | Vídeo duplicado |
| 73 | Tratamento de infarto do miocárdio | https://www.youtube.com/watch?v=S7IEdO4QevA | - |
| 74 | Infarto agudo de Miocardio IAM - Doctor Carlos José Jaramillo Gómez | https://www.youtube.com/watch?v=QGl-wcpmHjU | Vídeo duplicado |
| 75 | Testimonios pacientes-Infarto de miocardio | https://www.youtube.com/watch?v=EPeNgJw21sw | Língua espanhola |
| 76 | Infarto de miocardio y paro cardiaco | https://www.youtube.com/watch?v=F2F7rL9sTfM | Vídeo duplicado |
| 77 | INFARTO AGUDO DE MIOCARDIO, EL ANTES Y EL DESPUÉS. | https://www.youtube.com/watch?v=kL_5nzO0IVY | Vídeo duplicado |
| 78 | Infarto Agudo no Miocárdio - Diagnostico I 5/10 | https://www.youtube.com/watch?v=hgMjSPy3NCM | Vídeo duplicado |
| 79 | O que é o infarto agudo do miocárdio? | https://www.youtube.com/watch?v=0glmjuzaMlI | Vídeo duplicado |
| 80 | Cuidado del Tecnico al paciente con infarto agudo miocardio | https://www.youtube.com/watch?v=cw2ezz8CDMY | Vídeo duplicado |
| 81 | O que você sabe sobre Infarto Agudo do Miocárdio? | https://www.youtube.com/watch?v=aHeaIr0Wtm4 | Vídeo duplicado |
| 82 | 09 - Terapia Fármaco Invasiva en el Infarto Agudo del Miocardio con elevación del segmento | https://www.youtube.com/watch?v=GQaqwGM7ufk | Vídeo duplicado |
| 83 | INFARTO MIOCARDIO | https://www.youtube.com/watch?v=fZMKT1KttGU | Língua espanhola |
| 84 | Valoración del infarto agudo de miocardio - SERAM 2016 | https://www.youtube.com/watch?v=vPrPemNEqxI | Vídeo duplicado |
| 85 | QUE ES EL INFARTO AGUDO DE MIOCARDIO. Factores de riesgo, como actuar, tratamiento, etc. | https://www.youtube.com/watch?v=rczx8WmR4VM | Vídeo duplicado |
| 86 | Infarto agudo de miocardio - Complicaciones | https://www.youtube.com/watch?v=1F1YoVAeY5U | Língua espanhola |
| 87 | Infarto Agudo do Miocárdio Parte 4 - IAM Com Supradesnivelamento Segmento ST | https://www.youtube.com/watch?v=CIScG9Pzqs4 | Vídeo duplicado |
| 88 | ¿Cuáles son las causas más comunes del infarto agudo al miocardio? | https://www.youtube.com/watch?v=2AJH-yRinqo | Vídeo duplicado |
| 89 | 3° Modulo - C) Complicaciones mecánicas del infarto agudo de miocardio | https://www.youtube.com/watch?v=05gcc7ie0Js | Vídeo duplicado |
| 90 | Infarto Agudo do Miocárdio - Sintomas Atípicos - Neuropatia Diabética | https://www.youtube.com/watch?v=g8Ue4zvU9tI | Vídeo duplicado |
| 91 | O que é o infarto agudo do miocárdio? | GNDI | https://www.youtube.com/watch?v=2QwYJ9VSi4U | Vídeo duplicado |
| 92 | Fique atento para os sintomas do infarto do miocárdio | https://www.youtube.com/watch?v=IY_cil3_yOk | Vídeo duplicado |
| 93 | MANEJO PRÁCTICO DEL INFARTO AGUDO AL MIOCARDIO | https://www.youtube.com/watch?v=Ou1ZpAJyDXI | Vídeo duplicado |
| 94 | Dr. TV Perú (27-04-2015) - B1 - Tema del Día: Infarto Cardíaco | https://www.youtube.com/watch?v=kQeFe2eXT5M | Língua espanhola |
| 95 | Terapia de Reperfusão no Infarto Agudo do Miocárdio - Trombólise e Terapia Trombolítica 1/3 | https://www.youtube.com/watch?v=14BxhwOun9M | - |
| 96 | Infarto Agudo do Miocárdio | https://www.youtube.com/watch?v=CJ9cvCssYWQ | Vídeo duplicado |
| 97 | Complicaciones del infarto agudo al miocardio. XVIII Congreso Médico Estudiantil. | https://www.youtube.com/watch?v=qf9EmNeBJa8 | Vídeo duplicado |
| 98 | La actividad física después de un infarto | https://www.youtube.com/watch?v=0jelUjSDxhQ | Língua espanhola |
| 99 | 【Clasificación del IAM según su localización en el Ekg】 | https://www.youtube.com/watch?v=X_fxRFXhBaU | Vídeo duplicado |
| 100 | Infarto Agudo do Miocardio - Parte 1/2 | https://www.youtube.com/watch?v=2NEv74sZEEc | Vídeo duplicado |
| "infarto + agudo + miocárdio" | 1 | AULA GRATUITA - Infarto Agudo do Miocárdio de uma maneira como você nunca viu! | Prof. Lorena Campos | https://www.youtube.com/watch?v=05fAsiKwQA8 | - |
| 2 | INFARTO AGUDO DO MIOCÁRDIO | SÉRIE SAÚDE BRASIL | https://www.youtube.com/watch?v=LGxD1lffW7w | Vídeo duplicado |
| 3 | Sistema Cardiovascular 5/6: Artérias Coronárias e Infarto Agudo do Miocárdio | Anatomia e etc. | https://www.youtube.com/watch?v=oGurYO1t-wU | Vídeo duplicado |
| 4 | Infarto (ataque cardíaco) | Dicas de Saúde | https://www.youtube.com/watch?v=sEY_kS4fb-g&t=24s | Vídeo duplicado |
| 5 | Para combatir el infarto de miocardio | https://www.youtube.com/watch?v=X9iHgh-9Fpc | Língua espanhola |
| 6 | IAM - Infarto Agudo do Miocárdio | https://www.youtube.com/watch?v=lSj15f7vUzw | Vídeo duplicado |
| 7 | COMO ACONTECE UM INFARTO (ATAQUE CARDÍACO) - Dr. Marcelo Lima | https://www.youtube.com/watch?v=gYY-T8qnaXI | Vídeo duplicado |
| 8 | SINDROMES CORONARIOS AGUDOS PARTE 1 | https://www.youtube.com/watch?v=X-6hDI_ogYo | Língua espanhola |
| 9 | O que é infarto | https://www.youtube.com/watch?v=tyTHhgU-nEs | Vídeo duplicado |
| 10 | AULA GRATUITA - Tuberculose para concursos de Enfermagem | Prof. Cintia Lobo | 25-02 as 18h30 | https://www.youtube.com/watch?v=CJNakM2S0rw | Vídeo irrelevante |
| 11 | AULA GRATUITA - UTI em Exercícios para Concursos de Enfermagem | Prof.ª Lorena Campos | https://www.youtube.com/watch?v=BQn5jUC0VlY | Vídeo irrelevante |
| 12 | Infarto Agudo do Miocárdio (Eletrocardiograma) | https://www.youtube.com/watch?v=2st6GtS_4eA | Vídeo duplicado |
| 13 | Dr. Drauzio Varella explica como identificar e agir diante de um infarto. | https://www.youtube.com/watch?v=QFSm6HhXU50 | Vídeo duplicado |
| 14 | HCorExplica - Sintomas do Infarto Agudo do Miocárdio | https://www.youtube.com/watch?v=uyEAf4ySBOw | Vídeo duplicado |
| 15 | Cómo detectar un INFARTO AGUDO DE MIOCARDIO. Síntomas y signos principales | https://www.youtube.com/watch?v=Zv29R6ZS0OE | Língua espanhola |
| 16 | ECG Fácil - Aula 11 - Infarto Agudo do Miocárdio | https://www.youtube.com/watch?v=NwLmxRvQw_A | Vídeo duplicado |
| 17 | INFARTO AGUDO DO MIOCÁRDIO - RESUMO | PARTE 01 | https://www.youtube.com/watch?v=bAAZsmu8DTI | - |
| 18 | ¿Qué es un infarto agudo al miocardio? | https://www.youtube.com/watch?v=uggRbCHqKZo | Língua espanhola |
| 19 | Eletrocardiograma no infarto agudo do miocárdio - parte1 | https://www.youtube.com/watch?v=Psug0Bjx_gU | Vídeo duplicado |
| 20 | infarto do miocárdio como ocorre? Entenda o ataque cardíaco | https://www.youtube.com/watch?v=kqGVXAKOEF4 | Vídeo duplicado |
| 21 | Infarto Agudo do Miocárdio: Como ele acontece? Existem formas de prevenir? | https://www.youtube.com/watch?v=SCl_EBBn-SY | Vídeo duplicado |
| 22 | Infarto Agudo no Miocárdio - Fisiopatologia I 2/10 | https://www.youtube.com/watch?v=CNnp4YK5_Hs | Vídeo duplicado |
| 23 | HCor Explica: Infarto Agudo do Miocárdio | https://www.youtube.com/watch?v=nigTZ4HG1bI | - |
| 24 | Infarto agudo al miocardio | https://www.youtube.com/watch?v=69Qs4YSdHxA | Língua espanhola |
| 25 | Infarto Agudo do Miocárdio Parte 1 - Angina Estável | https://www.youtube.com/watch?v=a1zbLbPzf3s | - |
| 26 | Cuidados de Enfermagem e Farmacológicos no Infarto Agudo do Miocárdio | https://www.youtube.com/watch?v=cLMLSZ1dIDU | Vídeo duplicado |
| 27 | Fisiopatologia do Infarto do Agudo do Miocárdio | https://www.youtube.com/watch?v=O3jfQBA7xgQ | Vídeo duplicado |
| 28 | Infarto Agudo no Miocárdio | https://www.youtube.com/watch?v=EE0v4GWOPbU | Vídeo duplicado |
| 29 | Infarto Agudo do Miocardio - Parte 2 | https://www.youtube.com/watch?v=cbndiwW65rU | Vídeo duplicado |
| 30 | Infarto Agudo al Miocardio IAM - Fisioterapia | https://www.youtube.com/watch?v=vCu6iFhCNUk | Língua espanhola |
| 31 | INFARTOS Y ECG COMO NADIE TE LO HA EXPLICADO | https://www.youtube.com/watch?v=FKwcdvUAWXI | Língua espanhola |
| 32 | Infarto agudo de Miocardio | https://www.youtube.com/watch?v=7PG7IvrjQK4 | Língua espanhola |
| 33 | Infarto agudo do miocárdio | https://www.youtube.com/watch?v=o1DpXiTmtkY | - |
| 34 | Infarto al Miocardio | https://www.youtube.com/watch?v=A9C7UC0FQqA | Língua espanhola |
| 35 | Infarto Agudo al Miocardio | https://www.youtube.com/watch?v=Uy-vT0m2dak | Língua espanhola |
| 36 | Infarto del Miocardio | https://www.youtube.com/watch?v=RZWnkU7p5Ow | Língua espanhola |
| 37 | O que você sabe sobre Infarto Agudo do Miocárdio? | https://www.youtube.com/watch?v=aHeaIr0Wtm4 | - |
| 38 | Infarto Agudo do Miocárdio com supra de St - Manole Educação | https://www.youtube.com/watch?v=USGO1cWYKXA | - |
| 39 | Infarto agudo de miocardio - Electrocardiograma curso de interpretación del ECG | https://www.youtube.com/watch?v=d0JG929IzHs | Língua espanhola |
| 40 | Cuidado del Tecnico al paciente con infarto agudo miocardio | https://www.youtube.com/watch?v=cw2ezz8CDMY | Língua espanhola |
| 41 | Así se produce un infarto de miocardio | https://www.youtube.com/watch?v=r06y8AkfHEk | Língua espanhola |
| 42 | infarto agudo do miocárdio | https://www.youtube.com/watch?v=EGcgP9P5ncI | Língua espanhola |
| 43 | Isquemia e Infarto - Resumo - Patologia Geral | https://www.youtube.com/watch?v=NM2ji-fpCZU | Vídeo duplicado |
| 44 | Infarto agudo de Miocardio IAM - Doctor Carlos José Jaramillo Gómez | https://www.youtube.com/watch?v=QGl-wcpmHjU | Língua espanhola |
| 45 | QUANDO SURGIU O INFARTO AGUDO DO MIOCÁRDIO? | https://www.youtube.com/watch?v=iV-6_WdkyYE | Vídeo irrelevante |
| 46 | Infarto localización en el ECG | https://www.youtube.com/watch?v=JdVdDNf5-mc | Língua espanhola |
| 47 | Você sabe como ocorre o Infarto Agudo do Miocárdio? | https://www.youtube.com/watch?v=BY4KWJzVd74 | Vídeo duplicado |
| 48 | Esquema Síndrome Coronario Agudo (SCASEST / SCACEST) | https://www.youtube.com/watch?v=3qENdjiqRsQ | Língua espanhola |
| 49 | Doença arterial coronariana IV (Infarto com supradesnivelamento de ST) | CARDIOLOGIA | https://www.youtube.com/watch?v=p5HurF45YFA | Vídeo duplicado |
| 50 | 3° Modulo - C) Complicaciones mecánicas del infarto agudo de miocardio | https://www.youtube.com/watch?v=05gcc7ie0Js | Língua espanhola |
| 51 | ¿Qué es un infarto de miocardio y por qué se produce? | https://www.youtube.com/watch?v=3gQ3wHwxb8Y | Língua espanhola |
| 52 | INFARTO AGUDO DE MIOCARDIO, EL ANTES Y EL DESPUÉS. | https://www.youtube.com/watch?v=kL_5nzO0IVY | Língua espanhola |
| 53 | Dicas de Enfermagem: Infarto Agudo do miocárdio | https://www.youtube.com/watch?v=r3wgSXVo1kw | - |
| 54 | Infarto Agudo al Miocardio al ECG | https://www.youtube.com/watch?v=vE1-shiLxv0 | Língua espanhola |
| 55 | Tratamiento del infarto agudo de miocardio | https://www.youtube.com/watch?v=_NOVZXUeY8A | Língua espanhola |
| 56 | 09 - Terapia Fármaco Invasiva en el Infarto Agudo del Miocardio con elevación del segmento | https://www.youtube.com/watch?v=GQaqwGM7ufk | Língua espanhola |
| 57 | ATENDIMENTO AO INFARTO AGUDO DO MIOCÁRDIO (IAM) NO APH - COM DR. DAVI SOLLA | https://www.youtube.com/watch?v=6NCKNcrCcgw | Vídeo irrelevante |
| 58 | Infarto Agudo do Miocárdio - Tratamento Farmacológico do IAM -- Aula Completa | https://www.youtube.com/watch?v=ZaVxq_1rBcM | - |
| 59 | O que é o infarto agudo do miocárdio? | https://www.youtube.com/watch?v=0glmjuzaMlI | - |
| 60 | ¿Cómo se diagnostica un infarto agudo al miocardio? | https://www.youtube.com/watch?v=D5nSUOwzwwE | Língua espanhola |
| 61 | Infarto do Miocárdio - Primeiro atendimento | https://www.youtube.com/watch?v=wt5HGT4yznA | Vídeo duplicado |
| 62 | Complicaciones del infarto agudo al miocardio. XVIII Congreso Médico Estudiantil. | https://www.youtube.com/watch?v=qf9EmNeBJa8 | Língua espanhola |
| 63 | O que é o infarto agudo do miocárdio? | GNDI | https://www.youtube.com/watch?v=2QwYJ9VSi4U | - |
| 64 | TRATAMENTO DO INFARTO - #007 | https://www.youtube.com/watch?v=ibNk-v_KUcg | Vídeo duplicado |
| 65 | INFARTO COM SUPRA DE ST | https://www.youtube.com/watch?v=OqaGnGCD0OI | Vídeo duplicado |
| 66 | QUE ES EL INFARTO AGUDO DE MIOCARDIO. Factores de riesgo, como actuar, tratamiento, etc. | https://www.youtube.com/watch?v=rczx8WmR4VM | Língua espanhola |
| 67 | Testimonios pacientes-Infarto de miocardio | https://www.youtube.com/watch?v=Tv-o3O_hHLw | Língua espanhola |
| 68 | Infarto agudo del miocardio con elevación del ST, PARTE 1, (IAMCEST) | https://www.youtube.com/watch?v=oT8DaidcsXU | Língua espanhola |
| 69 | PACIENTE COM INFARTO AGUDO DO MIOCARDIO CHEGA NO B | https://www.youtube.com/watch?v=xXDP1oZzpkk | Vídeo duplicado |
| 70 | Valoración del infarto agudo de miocardio - SERAM 2016 | https://www.youtube.com/watch?v=vPrPemNEqxI | Língua espanhola |
| 71 | Cateterismo - Utilização para infarto agudo do miocárdio | https://www.youtube.com/watch?v=K6BFhUmyb6g | Vídeo duplicado |
| 72 | Infarto Agudo do Miocárdio - Sintomas Atípicos - Neuropatia Diabética | https://www.youtube.com/watch?v=g8Ue4zvU9tI | - |
| 73 | IAM con elevación del segmento ST - Fisiopatología | https://www.youtube.com/watch?v=wGSW__6ouxs | Língua espanhola |
| 74 | Infarto Agudo do Miocárdio | https://www.youtube.com/watch?v=0eFYblAUi8k | - |
| 75 | Clasificación del IAM según su localización en el Ekg | https://www.youtube.com/watch?v=X_fxRFXhBaU | Língua espanhola |
| 76 | MANEJO PRÁCTICO DEL INFARTO AGUDO AL MIOCARDIO | https://www.youtube.com/watch?v=Ou1ZpAJyDXI | Língua espanhola |
| 77 | Infarto do Miocárdio – causas, sintomas e tratamento | https://www.youtube.com/watch?v=w68dX5jvEFA | Vídeo duplicado |
| 78 | Infarto Agudo do Miocárdio | https://www.youtube.com/watch?v=CJ9cvCssYWQ | Língua inglesa |
| 79 | Trombolisis en infarto agudo del miocardio con elevación del segmento ST - Clínica Medellín | https://www.youtube.com/watch?v=XEDRffY4zMg | Língua espanhola |
| 80 | Infarto agudo al miocardio | https://www.youtube.com/watch?v=Tqb64Z9RLrk | Língua espanhola |
| 81 | infarto de miocardio no complicado - cardiologia | https://www.youtube.com/watch?v=7LvDgLAHmhY | Língua espanhola |
| 82 | Fibrinolisis en infarto agudo de miocardio con elevación del segmento st | https://www.youtube.com/watch?v=4JixA2lyhPA | Língua espanhola |
| 83 | ¿Cuáles son las causas más comunes del infarto agudo al miocardio? | https://www.youtube.com/watch?v=2AJH-yRinqo | Língua espanhola |
| 84 | Doenças do Coração, Artérias e Veias - Patologias do Sistema Cardiovascular - VideoAula 065 | https://www.youtube.com/watch?v=DVAXNIy-XrI | Vídeo duplicado |
| 85 | Infarto Agudo de Miocardio | https://www.youtube.com/watch?v=oNMgjQNz5aQ | Língua espanhola |
| 86 | Infarto do miocárdio - História de Jonh palmer | https://www.youtube.com/watch?v=nJrXy_dsArU | Vídeo duplicado |
| 87 | ¿Qué puedo hacer para prevenir un infarto agudo al miocardio? | https://www.youtube.com/watch?v=gnO9n2h8lok | Língua espanhola |
| 88 | Infarto Agudo do Miocardio - Parte 1/2 | https://www.youtube.com/watch?v=2NEv74sZEEc | Vídeo duplicado |
| 89 | O que é Infarto Agudo do Miocárdio? | Coração de Mãe Delboni | https://www.youtube.com/watch?v=bT5FxxylOio | - |
| 90 | Electrocardiograma: Isquemia y Lesión |Tabla mnemotécnica-clases de medicina | https://www.youtube.com/watch?v=A67NDj3_RrU | Língua espanhola |
| 91 | ¿Qué es Isquemia, Infarto y Necrosis? | https://www.youtube.com/watch?v=NMHqPfoYBjE | Língua espanhola |
| 92 | Infarto de miocardio y paro cardiaco | https://www.youtube.com/watch?v=F2F7rL9sTfM | Língua espanhola |
| 93 | Manejo Clinico del IAM con Elevacion del ST - Dra. Maribel Almonte | https://www.youtube.com/watch?v=ddeD-9KZqXE | Língua espanhola |
| 94 | Infarto Agudo do Miocardio - Patologia Geral | https://www.youtube.com/watch?v=L3H_om1M8yk | Vídeo irrelevante |
| 95 | INFARTO MIOCARDICO DE DIFERENTES CARAS Y VENTRICULO DERECHO | https://www.youtube.com/watch?v=-RYvhGkwBfo | Língua espanhola |
| 96 | Infarto de miocardio | https://www.youtube.com/watch?v=GwjsLwn26Hk | Língua espanhola |
| 97 | Programa para la Atención Temprana del Infarto Agudo al Miocardio | https://www.youtube.com/watch?v=s_9bbqz8T0A | Língua espanhola |
| 98 | Programa Saúde Vida - assunto de hoje infarto agudo do miocárdio | https://www.youtube.com/watch?v=q9OfP7XXKmg | Vídeo duplicado |
| 99 | 2 ¿Qué nos dicen de nuevo las guías de 2017 de IAM con elevación del ST | https://www.youtube.com/watch?v=oA-dgu9sQ50 | Língua espanhola |
| 100 | Infarto Agudo do Miocárdio | https://www.youtube.com/watch?v=odStpqnJVK4 | - |
| “trombose + coração” | 1 | Entenda o que é a trombose arterial | https://www.youtube.com/watch?v=HyBzcyc8aRY | - |
| 2 | Trombose Venosa Profunda (TVP) | https://www.youtube.com/watch?v=9XygQAFF0GU | Vídeo irrelevante |
| 3 | Trombose - Causa e tratamento | https://www.youtube.com/watch?v=XMLz6mnazF0 | - |
| 4 | Trombose mata mais que Aids, câncer e acidentes automobilísticos | https://www.youtube.com/watch?v=I8Rh6yfqOyI | Vídeo irrelevante |
| 5 | Trombo no Coração | https://www.youtube.com/watch?v=aEcmUbrSU1Q | Vídeo irrelevante e sem audio |
| 6 | Dor no peito + Falta de ar: pensar em TromboEmbolia Pulmonar ("Trombose no pulmão") | https://www.youtube.com/watch?v=mduuZVLQuCM | Vídeo irrelevante |
| 7 | trombo 1 | https://www.youtube.com/watch?v=_EFS8yV0ARU | Língua espanhola |
| 8 | Saúde: trombose - Mulheres (09/05/17) | https://www.youtube.com/watch?v=eU4dWdUuu3Q | Vídeo irrelevante |
| 9 | Desfaz Coágulos, Desentope os Vasos Saguíneos, Abaixa a Pressão... | https://www.youtube.com/watch?v=fOk_v7OOMsk | Vídeo irrelevante |
| 10 | "- A minha Veia tá entupida de COLESTEROL, como eu DESENTUPO?" 25/05 | https://www.youtube.com/watch?v=5D9Gr0qMXF8 | Vídeo duplicado |
| 11 | Trombose :Como é o tratamento ? | https://www.youtube.com/watch?v=ePjqUytIPOg | Vídeo irrelevante |
| 12 | Angina e trombose no intestino: sabia que existe? Relação intestino x coração. Ft: Thiago Mattosinho | https://www.youtube.com/watch?v=7hmeNwNTRig | Vídeo irrelevante |
| 13 | Você e o Doutor: conheça as causas e sintomas da trombose | https://www.youtube.com/watch?v=_i_yyXEAA9Y | Vídeo irrelevante |
| 14 | Saúde pelas Plantas - Rubim [circulação, trombose, cardíaca, digestiva, antibiótica] | https://www.youtube.com/watch?v=NB73EJA4Ukk | Vídeo irrelevante |
| 15 | TVP e Embolia Pulmonar | https://www.youtube.com/watch?v=lexsHJZ8Ifo | Vídeo irrelevante |
| 16 | Saiba tudo sobre a Trombose! | https://www.youtube.com/watch?v=jCsVs8fOtys | Vídeo irrelevante |
| 17 | Atenção!! 7 Sinais de Coágulo Sanguíneo que você não Pode Ignorar! | Naturalmente Saudável | https://www.youtube.com/watch?v=zz_KG2O2kQM | Vídeo irrelevante |
| 18 | Top 8 Sintomas que indicam que VOCÊ está com problemas.! | https://www.youtube.com/watch?v=37iZqVdqPuI | Vídeo irrelevante |
| 19 | Doenças do Coração, Artérias e Veias - Patologias do Sistema Cardiovascular - VideoAula 065 | https://www.youtube.com/watch?v=DVAXNIy-XrI | Vídeo duplicado |
| 20 | Tromboembolectomia - Oclusão Aguda Artéria Femoral | https://www.youtube.com/watch?v=KKJxv1-oEQ4 | Vídeo irrelevante |
| 21 | Trombose Causa e tratamento | https://www.youtube.com/watch?v=k03DIdMdmjA | Vídeo duplicado |
| 22 | 5 REMÉDIOS CASEIROS PARA MELHORAR A CIRCULAÇÃO | Dr Dayan Siebra | https://www.youtube.com/watch?v=CvxphxEIwW0 | - |
| 23 | Em Forma: Exercícios para ativar a circulação sanguínea (07/08/17) | https://www.youtube.com/watch?v=GeJAXj3CliM | Vídeo irrelevante |
| 24 | TROMBOSE, sintomas que você não pode ignorar | https://www.youtube.com/watch?v=VJBJ4Qmw_Co | Vídeo irrelevante |
| 25 | OS TRÊS SINTOMAS DE SAÚDE QUE VOCÊ NÃO DEVE IGNORAR NUNCA | https://www.youtube.com/watch?v=ecI1nJSg1dI | Vídeo irrelevante |
| 26 | 🌿🍁LIMPEZA ARTÉRIAS DO CORAÇÃO DE FORMA NATURAL,AUXÍLIO, CONTRA,TROMBOSE,ETC | https://www.youtube.com/watch?v=uIUsC-W6XCU | Vídeo irrelevante |
| 27 | Trombose - Dr. Romualdo Maffra Jr. esclarece dúvidas | https://www.youtube.com/watch?v=kZTx1-FHPtM | Vídeo irrelevante |
| 28 | Trombose venosa profunda: um coágulo de sangue pode ser fatal. Atenção a estes sintomas | https://www.youtube.com/watch?v=_AoA6gbOy3o | Vídeo irrelevante |
| 29 | Saúde Pelas Plantas - Alho [câncer, coração, circulação, hipertensão, colesterol, fígado] | https://www.youtube.com/watch?v=WgLBUeBbHow | - |
| 30 | Alimentos que vão EVITAR que você tenha um Derrame, Trombose ou Infarto! | https://www.youtube.com/watch?v=riBGKRy4vDg | - |
| 31 | Pressão Alta Lair Ribeiro, Conheça o CHOCOLATE Que Trata a Hipertensão Arterial | https://www.youtube.com/watch?v=hU4kLxAXsPY&list=PL5obqh8vUYh-CVDjdpEIDOiLQjLM9pm7c | Vídeo irrelevante |
| 32 | 🔴 Quais doenças geram direito à aposentadoria por invalidez? | https://www.youtube.com/watch?v=8t9MDPsCHh4 | Vídeo irrelevante |
| 33 | Dica Rápida: Diferenças entre Trombose e Embolia | https://www.youtube.com/watch?v=hUSWAbk981s | Vídeo irrelevante |
| 34 | Frequência Rife para tratar Trombose venosa | https://www.youtube.com/watch?v=79IzN_J6QfQ | Vídeo irrelevante |
| 35 | Trombose + Síndrome dos Ovários Policísticos + Gravidez?! | https://www.youtube.com/watch?v=0MAa6TweMps | Vídeo irrelevante |
| 36 | Coagulação do Sangue | https://www.youtube.com/watch?v=e4cQw70owYA | Vídeo irrelevante |
| 37 | Aterosclerose (Doença do coração) | https://www.youtube.com/watch?v=1Rc6RdSGDJI | - |
| 38 | Tv Transamerica - Trombose | https://www.youtube.com/watch?v=p3cvMNApKmE | - |
| 39 | [[ SUAS PERNAS ESTÃO INCHADAS? ] | https://www.youtube.com/watch?v=2YN2R0qp7_E | Vídeo irrelevante |
| 40 | # 021# Trombose Venosa Profunda | https://www.youtube.com/watch?v=J2DGa-oFb7g | Vídeo irrelevante |
| 41 | Isquemia e Infarto - Resumo - Patologia Geral | https://www.youtube.com/watch?v=NM2ji-fpCZU | Vídeo duplicado |
| 42 | Doenças Que Dão Direito a Aposentadoria Por Invalidez-Saiba Aqui | https://www.youtube.com/watch?v=YqKqZhwdAmA | Vídeo irrelevante |
| 43 | Aqui esta a solução para PROBLEMAS CIRCULATÓRIOS | https://www.youtube.com/watch?v=GKaDtchMrf8 | Vídeo irrelevante |
| 44 | Diabetes: Não Ignore Estes Primeiros Sintomas | https://www.youtube.com/watch?v=h7g3SWSpm_4 | Vídeo irrelevante |
| 45 | 10 Sinais Alarmantes De Que O Seu Coração Não Está Funcionando Direito | https://www.youtube.com/watch?v=cp172xNnRhk | Vídeo duplicado |
| 46 | SAÚDE MIX - TROMBOSE | https://www.youtube.com/watch?v=zho8ef3X5To | Vídeo irrelevante |
| 47 | Cirurgia de Revascularização do Miocárdio (CRM) | https://www.youtube.com/watch?v=wD5GO2rs36Y | - |
| 48 | 5 Sinais de Que Há Algo Errado Com a Circulação- Você Bonita (15/05/18) | https://www.youtube.com/watch?v=9Y2lnN1Bt18 | Vídeo irrelevante |
| 49 | AAS e infarto | https://www.youtube.com/watch?v=ZuaOGjUwtbw | - |
| 50 | 8 Sintomas de Problemas No Fígado | Dr. Juliano Pimentel | https://www.youtube.com/watch?v=-9RzEYnRDDw | Vídeo irrelevante |
| 51 | Viver Bem: saiba como evitar a trombose | https://www.youtube.com/watch?v=ZREioIwOS3k | Vídeo irrelevante |
| 52 | GINKGO BILOBA: LIBIDO, CORAÇÃO, ANSIEDADE, VISÃO, PRESSÃO ARTERIAL E OUTROS | https://www.youtube.com/watch?v=CdLcFzxElRg | - |
| 53 | Remedios em casa para trombose. | https://www.youtube.com/watch?v=JBjG8DkKKtw | - |
| 54 | Trombo em veia cava - coração | https://www.youtube.com/watch?v=9K-IacxdA1g | Vídeo irrelevante e sem audio |
| 55 | TVC – Tratamentos e pós-operatório de varizes no Viver Melhor | https://www.youtube.com/watch?v=WchHLG42f9k | Vídeo irrelevante |
| 56 | Trombose: 8 mitos e verdades sobre a doença | https://www.youtube.com/watch?v=dXYVO5ofc64 | Vídeo irrelevante |
| 57 | Combate Trombose, Fortalece a Pele, as Unhas, os Cabelos... 💖 REMÉDIO CASEIRO 293 | https://www.youtube.com/watch?v=XYWNjAE-e0I | Vídeo irrelevante |
| 58 | Saúde Pelas Plantas - Cebola [trombose, arteriosclerose, colesterol, diabetes, gripe, bronquite] | https://www.youtube.com/watch?v=hstnBNreHxc | - |
| 59 | Se você sofre de Má Circulação nas pernas e até TROMBOSE, coma isso todos os dias. | https://www.youtube.com/watch?v=0uu7WVaJiWY | Vídeo irrelevante |
| 60 | Novidade em Itajaí: Disponível novo tratamento para PREVENIR a trombose em pacientes com câncer | https://www.youtube.com/watch?v=06tl0f2hXAY | Vídeo irrelevante |
| 61 | Sequelas da Trombose Venosa Profunda [TVP] 2016 | https://www.youtube.com/watch?v=liFeARjaQWc | Vídeo irrelevante |
| 62 | DICAS DE SAÚDE - RISCO DE INFARTO E AVC | DR LAIR RIBEIRO 11/04 | https://www.youtube.com/watch?v=qEJdkmENl7c | Vídeo duplicado |
| 63 | AAS AFINA O SANGUE? | https://www.youtube.com/watch?v=Q4YGdEAaxds | - |
| 64 | Ecocardiograma ( Echocardiography ) - Trombo no Átrio do Coração ( THROMBUS IN HEART ATRIUM ) | https://www.youtube.com/watch?v=KKiNeAHLAGc | Vídeo irrelevante |
| 65 | Alterações no ritmo do coração | https://www.youtube.com/watch?v=Mdcqc7T7Xfs | Vídeo irrelevante |
| 66 | Revisão - Trombose Venosa Profunda | https://www.youtube.com/watch?v=MN4Ob7-wF9o | Vídeo irrelevante |
| 67 | O que é trombose arterial ? | https://www.youtube.com/watch?v=RvNgtsjCIBg | - |
| 68 | Gestação de alto risco - Quando a gravidez traz risco de morte para mãe ou bebê | https://www.youtube.com/watch?v=IhXd_UDtCB8 | Vídeo irrelevante |
| 69 | Trombos em coronária direita | https://www.youtube.com/watch?v=e1_lG0NHs84 | - |
| 70 | DIREITOS DOS PACIENTES COM DOENÇAS CRÔNICAS | https://www.youtube.com/watch?v=iByUdJ9jqZg | Vídeo irrelevante |
| 71 | Quando retirar a veia safena? Não vai fazer falta? | https://www.youtube.com/watch?v=8NqdRL0NWm0 | Vídeo irrelevante |
| 72 | Trombose venosa # 5 remédios caseiros para trombose venosa profunda | https://www.youtube.com/watch?v=Q0z0h_yVgt0 | Vídeo irrelevante |
| 73 | Exercícios que ajudam a circulação sanguínea! | https://www.youtube.com/watch?v=6tHn3Qnit1w | Vídeo irrelevante |
| 74 | Este chá combate trombose melhora circulação e o coração | https://www.youtube.com/watch?v=USNLV8GBDmU | Vídeo irrelevante |
| 75 | Oração para curar AVC, derrame cerebral e isquemia - A sua fé tem muito poder sim! | https://www.youtube.com/watch?v=F_bWus-McPE | Vídeo irrelevante |
| 76 | Trombose Venosa Profunda TVP | https://www.youtube.com/watch?v=1TLbQWaaqIE | Vídeo irrelevante |
| 77 | Espuma na Veia Safena | https://www.youtube.com/watch?v=xmWFE9R0UdQ | Vídeo irrelevante |
| 78 | Tudo de Bom - Trombose do viajante | https://www.youtube.com/watch?v=xr38z62TUEY | Vídeo irrelevante |
| 79 | 5 ALIMENTOS PARA DESINFLAMAR SEU CORPO. O ÚLTIMO VAI TE SURPREENDER! | Dra Ingrid Serafim | https://www.youtube.com/watch?v=8THv2Td2zXM | Vídeo irrelevante |
| 80 | Veja o que provoca má circulação e como evitar dor na perna e cansaço | https://www.youtube.com/watch?v=UOw4MaPDB38 | Vídeo irrelevante |
| 81 | Aprenda exercícios que auxiliam na prevenção da má circulação | https://www.youtube.com/watch?v=ViI81ZvE5NU | Vídeo irrelevante |
| 82 | Inchaço nos pés pode ser causado por diversos fatores; saiba mais | https://www.youtube.com/watch?v=YngMJtIrD0s | Vídeo irrelevante |
| 83 | Cardiologista Vander Weyden e a importância do AAS para doenças do coração | https://www.youtube.com/watch?v=u-VpRiPdBlI | Vídeo irrelevante |
| 84 | Obliteração de veia safena com radiofrequência | https://www.youtube.com/watch?v=c7LPhPnHkaA | Vídeo irrelevante |
| 85 | Como limpar ou desobstruir as artérias com uma única fruta | https://www.youtube.com/watch?v=rq4JvmPMbVA | - |
| 86 | Os 10 melhores alimentos para limpar artérias e veias⭐️❤️ | https://www.youtube.com/watch?v=3tO-wvdqqGo | - |
| 87 | Trombose: dá para prevenir | https://www.youtube.com/watch?v=QdOkoIlZtSY | Vídeo irrelevante |
| 88 | Dor na panturrilha, entenda o sintoma | Dr. Salim | Jovem Pan | https://www.youtube.com/watch?v=xtWn0-YytAg | Vídeo irrelevante |
| 89 | ⭐️❤️Melhore a circulação e elimine o inchaço com estas dicas e o suco de uva e melão! | https://www.youtube.com/watch?v=sdbXjm2QiKc | Vídeo irrelevante |
| 90 | Quem Tem Varizes Pode Fazer Atividade Física/Musculação? - Canal do Personal | https://www.youtube.com/watch?v=_ZPP9pc4M1M | Vídeo irrelevante |
| 91 | Receita da Saúde | https://www.youtube.com/watch?v=Qa6H3rK4wNU | Vídeo irrelevante |
| 92 | Remoção de coágulo no cérebro | https://www.youtube.com/watch?v=IGCDPi6N-bs | Vídeo irrelevante |
| 93 | ⭐️❤️Nunca use gengibre se você tiver um destes problemas de saúde! | https://www.youtube.com/watch?v=JTA05QZeCi0 | Vídeo irrelevante |
| 94 | aula drheitor mpg8 - Coagulação isquemia e trombose | https://www.youtube.com/watch?v=zPpT0oDtI4s | - |
| 95 | CUIDADO COM AS MANCHAS ROXAS NA PELE PODEM SER UM SINAL DE PROBLEMA | https://www.youtube.com/watch?v=Ox8x1UqFfb8 | Vídeo irrelevante |
| 96 | Formação da placa de ateroma (Aterosclerose) | https://www.youtube.com/watch?v=BIQtntZZGqI | Vídeo duplicado |
| 97 | Trombose – Sintomas , o que é, tratamentos e como se previr | https://www.youtube.com/watch?v=WzNbF0xi0p4 | Vídeo irrelevante |
| 98 | Saiba como combater as dores nas pernas! | https://www.youtube.com/watch?v=DdY6R8cOsFc | Vídeo irrelevante |
| 99 | Este chá vai te proteger de um AVC (ou Derrame) durante à noite!! 💖 REMÉDIO CASEIRO 10 | https://www.youtube.com/watch?v=WfeisR45x-w | Vídeo irrelevante |
| 100 | Como ocorre o AVC embólico - Telemedicina Morsch | https://www.youtube.com/watch?v=yhYzirQLmQw | Vídeo irrelevante |
| "trombose + coronária" | 1 | Entenda o que é a trombose arterial | https://www.youtube.com/watch?v=HyBzcyc8aRY | Vídeo duplicado |
| 2 | Trombose - Causa e tratamento | https://www.youtube.com/watch?v=XMLz6mnazF0 | Vídeo duplicado |
| 3 | Trombos em coronária direita | https://www.youtube.com/watch?v=e1_lG0NHs84 | Vídeo duplicado |
| 4 | Trombosis Coronaria | https://www.youtube.com/watch?v=D5GvbfCUIi0 | Língua espanhola |
| 5 | Assista a aula sobre Aterosclerose simulada na nova Lousa 3D Estereoscópico | https://www.youtube.com/watch?v=82lhbkxgyNc | Vídeo duplicado |
| 6 | O que é Doença arterial coronariana | https://www.youtube.com/watch?v=uhy2VmqvjOs | - |
| 7 | Cirurgia de Revascularização do Miocárdio (CRM) | https://www.youtube.com/watch?v=wD5GO2rs36Y | Vídeo duplicado |
| 8 | trombo 1 | https://www.youtube.com/watch?v=_EFS8yV0ARU | Vídeo duplicado |
| 9 | Doenças do Coração, Artérias e Veias - Patologias do Sistema Cardiovascular - VideoAula 065 | https://www.youtube.com/watch?v=DVAXNIy-XrI | Vídeo duplicado |
| 10 | TVP e Embolia Pulmonar | https://www.youtube.com/watch?v=lexsHJZ8Ifo | Vídeo duplicado |
| 11 | Trombose Venosa Profunda (TVP) | https://www.youtube.com/watch?v=9XygQAFF0GU | Vídeo duplicado |
| 12 | Limpeza das veia artéria. Tratamento do limão | https://www.youtube.com/watch?v=bcCtxoZPE9o | - |
| 13 | Angioplastia Coronariana | https://www.youtube.com/watch?v=z5kpgITHPRI | - |
| 14 | Desfaz Coágulos, Desentope os Vasos Saguíneos, Abaixa a Pressão... | https://www.youtube.com/watch?v=fOk_v7OOMsk | Vídeo duplicado |
| 15 | Saúde: trombose - Mulheres (09/05/17) | https://www.youtube.com/watch?v=eU4dWdUuu3Q | Vídeo duplicado |
| 16 | Aterosclerose | https://www.youtube.com/watch?v=8u4bPdhcTPk | - |
| 17 | Aterosclerose (Doença do coração) | https://www.youtube.com/watch?v=1Rc6RdSGDJI | Vídeo duplicado |
| 18 | - A minha Veia tá entupida de COLESTEROL, como eu DESENTUPO?" 25/05 | https://www.youtube.com/watch?v=5D9Gr0qMXF8 | Vídeo duplicado |
| 19 | Diferenciando trombose de vegetação ao ecocardiograma | https://www.youtube.com/watch?v=rwI1mO0p5AY | Vídeo irrelevante e sem audio |
| 20 | Tive Trombose e Fístula | https://www.youtube.com/watch?v=vbPfoduWED4 | Vídeo irrelevante |
| 21 | Formação da placa de ateroma (Aterosclerose) | https://www.youtube.com/watch?v=BIQtntZZGqI | Vídeo duplicado |
| 22 | Etiopatogenia 2 - Doença Arterial Coronariana 6/10 | https://www.youtube.com/watch?v=TRqUwR-N1XM | Vídeo duplicado |
| 23 | Temer tem obstrução na coronária | https://www.youtube.com/watch?v=lmXYPM8gmjo | Vídeo irrelevante |
| 24 | # 021# Trombose Venosa Profunda | https://www.youtube.com/watch?v=J2DGa-oFb7g | Vídeo duplicado |
| 25 | florada da linhaça | https://www.youtube.com/watch?v=FAfn7uYzOiM | Vídeo irrelevante |
| 26 | Viver Bem: saiba como evitar a trombose | https://www.youtube.com/watch?v=ZREioIwOS3k | Vídeo duplicado |
| 27 | OCLUSÃO CRÔNICA CORONARIANA: MUDANÇA DE PARADIGMA 2019 | https://www.youtube.com/watch?v=EnjLRVhqGYk | Vídeo irrelevante |
| 28 | Aparelho pode visualizar obstrução das artérias coronárias | https://www.youtube.com/watch?v=L6j23NPZNR8 | - |
| 29 | "Usei anticoagulante por mais de um ano", diz analista de RH que sofreu trombose l SEMPRE FELIZ | https://www.youtube.com/watch?v=M6npYg5mIwg | Vídeo irrelevante |
| 30 | Trombose e coágulos | Vida & Saúde | https://www.youtube.com/watch?v=pw8sL7vre_Q | Vídeo irrelevante |
| 31 | Como plantar cebola em vasos, processo completo! | https://www.youtube.com/watch?v=X0jKzbSGFJ8 | Vídeo irrelevante |
| 32 | Cirurgião Vascular explica o que é Trombose, suas complicações e como se prevenir | https://www.youtube.com/watch?v=mEPTdxbBbSo | Vídeo irrelevante |
| 33 | Angina e trombose no intestino: sabia que existe? Relação intestino x coração. Ft: Thiago Mattosinho | https://www.youtube.com/watch?v=7hmeNwNTRig | Vídeo irrelevante |
| 34 | HCPA - Grand Round - Angioplastia Vs Cirurgia no Tratamento de Doença Arterial Coronária | https://www.youtube.com/watch?v=Wd3XAJ9hqBw | - |
| 35 | Coração 04 - Irrigação (coronárias) e drenagem - Vídeo aula de Sistema circulatório | https://www.youtube.com/watch?v=ZejURpld0Oc | - |
| 36 | Médico explica tudo sobre exame de Cateterismo | https://www.youtube.com/watch?v=QYljYcju5R4 | - |
| 37 | Angioplastia arterial com implante de stent - www.drcardozo.com.br | https://www.youtube.com/watch?v=MxM7FEgOAxs | - |
| 38 | Trombose e Embolia - Resumo - Patologia Geral | https://www.youtube.com/watch?v=jkQs38z9svU | Vídeo irrelevante |
| 39 | Você e o Doutor: conheça as causas e sintomas da trombose | https://www.youtube.com/watch?v=_i_yyXEAA9Y | Vídeo duplicado |
| 40 | O que é trombose arterial ? | https://www.youtube.com/watch?v=RvNgtsjCIBg | Vídeo duplicado |
| 41 | Farmacologia - Antiagregantes Plaquetários | https://www.youtube.com/watch?v=DS3ZW6GHtrg | - |
| 42 | Anatomia Coronária - Trecho CardioAula | https://www.youtube.com/watch?v=URCxdJsgkBs | Vídeo irrelevante |
| 43 | Prof Emérito Francisco Maffei - Videoaula - Trombose venosa profunda e suas complicações - Parte 3-4 | https://www.youtube.com/watch?v=n8x9tgXOA-I | Vídeo irrelevante |
| 44 | Questão - coronária | https://www.youtube.com/watch?v=_K-4sNq0qTs | Vídeo irrelevante e sem audio |
| 45 | Trombose :Como é o tratamento ? | https://www.youtube.com/watch?v=ePjqUytIPOg | Vídeo duplicado |
| 46 | Nas - Blunt Ashes (Legendado Pt-BR) | https://www.youtube.com/watch?v=68pcLK-qMAE | Vídeo irrelevante e língua inglesa |
| 47 | Causas, síntomas y tratamiento de la trombosis | https://www.youtube.com/watch?v=HZpwDGRNQzk | Língua espanhola |
| 48 | Isquemia e Infarto - Resumo - Patologia Geral | https://www.youtube.com/watch?v=NM2ji-fpCZU | Vídeo duplicado |
| 49 | Exames para Diagnosticar a Doença Arterial Coronária | https://www.youtube.com/watch?v=gNm8-DgzMN8 | - |
| 50 | Veia porta | https://www.youtube.com/watch?v=1DK2bucjo1U | Vídeo irrelevante |
| 51 | Trombose: Causas e Tratamento - Revista da Cidade (06/12/2017) | https://www.youtube.com/watch?v=-VfE9gTevLw | Vídeo irrelevante |
| 52 | 7 remédios naturais para afinar o sangue | https://www.youtube.com/watch?v=dTV6Biwqf28 | - |
| 53 | Arteria coronária obstruida. Como identificar | https://www.youtube.com/watch?v=feF0l22Bp0M | - |
| 54 | Tortuosidades, Calcio, Dissecções e Perfurações 2012 Gustavo Laufer | https://www.youtube.com/watch?v=EHjZNsiUSr8 | Vídeo irrelevante |
| 55 | HCPA - Grand Round - Atualização no tratamento da doença coronariana crônica | https://www.youtube.com/watch?v=Ky9LR8kgt9o | Vídeo irrelevante |
| 56 | AULA PRATICA Artéria ascendente coronárias | https://www.youtube.com/watch?v=gPIXITqsSss | Vídeo irrelevante |
| 57 | Son Espases implanta una nueva técnica para extraer un trombo a pacientes que sufran un Ictus | https://www.youtube.com/watch?v=j2DZZlzd8e0 | Língua inglesa |
| 58 | O que é uma angioplastia e um stent? | https://www.youtube.com/watch?v=YaZzgBJiIT8 | - |
| 59 | Trombose mata mais que Aids, câncer e acidentes automobilísticos | https://www.youtube.com/watch?v=I8Rh6yfqOyI | Vídeo duplicado |
| 60 | Abordagem atual das lesões de tronco de coronária esquerda - Dr. Marco Antonio Perin | https://www.youtube.com/watch?v=bZ-tYG3B0J0 | - |
| 61 | O que é trombose pulmonar ? | https://www.youtube.com/watch?v=k8KXd76byfg | Vídeo irrelevante |
| 62 | Coronária direita | https://www.youtube.com/watch?v=6qzmHl45P3g | Vídeo irrelevante e sem audio |
| 63 | Biokrill Acústico - Taquicardia | https://www.youtube.com/watch?v=z84Ym7uTKGE | Vídeo irrelevante |
| 64 | Angioplastia de la Arteria Coronaria Derecha | https://www.youtube.com/watch?v=SlP9zGQEnl4 | - |
| 65 | COMO SABER CUANDO ESTAMOS AL BORDE DE UN INFARTO O UNA TROMBOSIS | https://www.youtube.com/watch?v=dJbdHN2ohWM | Língua espanhola |
| 66 | Vídeo Aula 128 - Sistema Circulatório: Artérias e Veias dos Membros Superiores (MMSS) | https://www.youtube.com/watch?v=htknOGMXQJA | Vídeo irrelevante |
| 67 | MINHA CLIENTE TOMA ANTICOAGULANTE E AGORA??? | https://www.youtube.com/watch?v=yTolcrFS9Kk | Vídeo irrelevante |
| 68 | Aterosclerose, mecanismo da formação de placas ateromatosas | https://www.youtube.com/watch?v=Ht2IJQ_ImJ4 | - |
| 69 | Alimentos que vão EVITAR que você tenha um Derrame, Trombose ou Infarto! | https://www.youtube.com/watch?v=riBGKRy4vDg | Vídeo duplicado |
| 70 | Ectasia Coronaria Arteria Descendente Anterior | https://www.youtube.com/watch?v=_Sv0WRNxChA | Vídeo irrelevante e sem audio |
| 71 | Pesquisa indica redução de uso de antiplaquetários em angioplastia | https://www.youtube.com/watch?v=OAUI5IgRnS4 | - |
| 72 | Cateterismo ou Arteriografia Seguida de Angioplastia com stent | https://www.youtube.com/watch?v=Jtdy8hvx9KI | - |
| 73 | Trombosis y Enfermedad Coronaria. Dr. Antonio García. Update AHA Congress 2012 | https://www.youtube.com/watch?v=aJ2YaErKt_w | Língua espanhola |
| 74 | Exame de Cineangiocoronariografia - Paciente com Obstrução na Coronária | https://www.youtube.com/watch?v=IfNPPDSHboU | Sem audio |
| 75 | Stent em tronco de coronária esquerda . Manter a dupla antiagregacao por quanto tempo ? | https://www.youtube.com/watch?v=MZ9h54LPf5Q | - |
| 76 | Tv Transamérica - Tratamento de quimioterapia pode resultar em complicações coronárias | https://www.youtube.com/watch?v=otTYbYETdtw | Vídeo irrelevante |
| 77 | Derrames e a artéria carótida: Dr Alexandre Amato | https://www.youtube.com/watch?v=CSh46oWeIe0 | Vídeo irrelevante |
| 78 | cateterismo cardíaco: arteriografía coronaria y angioplastía (implante de stent) | https://www.youtube.com/watch?v=MNdLkQ3no-0 | Língua espanhola e sem audio |
| 79 | Realizan jornada de cateterismo y angioplastia coronaria en Hospital Vargas | https://www.youtube.com/watch?v=-KfUTA9yoFA | Língua espanhola |
| 80 | Síndrome do Roubo Coronária subclávia após Revascularização Cirúrgica do Miocárdio | https://www.youtube.com/watch?v=0QqDUdUyeMU | - |
| 81 | Remédio natural para limpar as artérias coronárias | https://www.youtube.com/watch?v=__9Vwto_CaE | - |
| 82 | Sinais da Trombose | https://www.youtube.com/watch?v=ErvW5EE1ajM | Vídeo irrelevante |
| 83 | Trombose venosa profunda: um coágulo de sangue pode ser fatal. Atenção a estes sintomas | https://www.youtube.com/watch?v=_AoA6gbOy3o | Vídeo duplicado |
| 84 | Taquicardia - Biokrill Rap feat. Pedro Qualy (Haikaiss) | https://www.youtube.com/watch?v=gT6fIma9zHM | Vídeo irrelevante |
| 85 | CIRURGIA DE ANEURISMA DE AORTA ABDOMINAL | https://www.youtube.com/watch?v=FlJSihYcTB0 | Vídeo irrelevante |
| 86 | Medicamentos para tosse e resfriado e muito mais no Round da PEBMED | https://www.youtube.com/watch?v=J8K_c8VZdWU | Vídeo irrelevante |
| 87 | Limpe suas artérias e fortaleça a imunidade com esta simples receita natural⭐️❤️ | https://www.youtube.com/watch?v=EyAMDfY4sp0 | - |
| 88 | 3 ANTICONCEPCIONAIS QUE NÃO ENGORDAM | BOA GRAVIDEZ | https://www.youtube.com/watch?v=aM_WC8_TgB0 | Vídeo irrelevante |
| 89 | Artéria descendente anterior com trombo | https://www.youtube.com/watch?v=_lPqLig9G5U | - |
| 90 | Doença Arterial Periférica: Causas e Diagnóstico - Dica Biocentro | https://www.youtube.com/watch?v=L62fJlffies | Vídeo irrelevante |
| 91 | Recanalização de veias centrais na Insuficiência Venosa Crônica | https://www.youtube.com/watch?v=PV4xz41Zoe4 | Vídeo irrelevante |
| 92 | Ateroesclerosis (Cardiopatía) | https://www.youtube.com/watch?v=4hxEarwCazQ | Língua espanhola |
| 93 | Cateterismo cardíaco e angioplastia - Mulheres (29/09/16) | https://www.youtube.com/watch?v=O9Jx79he-Rw | - |
| 94 | Na Praia: Uma Planta Para Turbinar O Desempenho Masculino!! | https://www.youtube.com/watch?v=wJ5Q9PwiJto | Vídeo irrelevante |
| 95 | Aneurisma aórtico abdominal | https://www.youtube.com/watch?v=l6TS3gpFbZk | Vídeo irrelevante e língua espanhola |
| 96 | Angioplastia de Artéria Carótida | https://www.youtube.com/watch?v=vde_1Lf3AhM | Vídeo irrelevante |
| 97 | Fistula coronaria | https://www.youtube.com/watch?v=_J2jbDWdN3k | Vídeo irrelevante |
| 98 | Protocolo TEP: Angiotomografia das artérias pulmonares | https://www.youtube.com/watch?v=kq0tVGWGkJY | Vídeo irrelevante |
| 99 | CATETERISMO CARDÍACO: TUDO O QUE VOCÊ QUER SABER! | https://www.youtube.com/watch?v=9iPWKdm0sk4 | - |
| 100 | Trombo em átrio direito | https://www.youtube.com/watch?v=UZNP9O9wTHI | Vídeo irrelevante |

URL, uniform resource locator

**Tabela Suplementar 2**. Princípios DISCERN adaptados

|  | **Princípios DISCERN** |
| --- | --- |
| 1 | **Os objetivos são claros?**  Uma publicação de qualidade deve referir o assunto abordado, o conteúdo incluído e a quem se dirige |
| 2 | **Os objetivos são atingidos?**  Uma publicação de qualidade fornece a informação a que se propõe |
| 3 | **A publicação é relevante?**  Uma publicação de qualidade deve corresponder às circunstâncias e realidade do público a quem se dirige |
| 4 | **As fontes de informação utilizadas são claras?**  Uma publicação de qualidade apresenta de forma clara e detalhada a origem da informação apresentada (o autor ou produtor não são considerados fonte) |
| 5 | **A data de publicação das fontes de informação utilizadas é apresentada?**  Uma publicação de qualidade explicita a data de publicação das suas fontes |
| 6 | **A publicação é imparcial?**  Uma publicação de qualidade apresenta a informação de forma imparcial e justa, permitindo aos leitores retirar conclusões não influenciadas pelos autores |
| 7 | **São apresentados detalhes sobre fontes de informação adicionais?**  Uma publicação de qualidade faz referência a fontes de informação adicionais |
| 8 | **A publicação refere-se a áreas de incerteza?**  Uma publicação de qualidade faz referência a “áreas cinzentas” do conhecimento, realçando a ausência de evidência clara em determinadas circunstâncias particulares |
| 9 | **O mecanismo de ação das várias opções terapêuticas é descrito?**  Uma publicação de qualidade explicita o mecanismo de ação de cada opção terapêutica e a sua influência na patologia e nas suas manifestações clínicas |
| 10 | **A publicação descrever os benefícios de cada tratamento?**  Uma publicação de qualidade faz referência às vantagens de cada opção terapêutica |
| 11 | **A publicação menciona os riscos de cada tratamento?**  Uma publicação de qualidade refere as desvantagens de cada opção terapêutica |
| 12 | **A publicação descreve as consequências de não iniciar tratamento?**  Uma publicação de qualidade deve referir as consequências da ausência de tratamento |
| 13 | **A influência das opções terapêuticas sobre a qualidade de vida é mencionada?**  Uma publicação de qualidade deve fazer referência ao impacto do tratamento sobre a rotina diária do doente. |
| 14 | **É clara a existência de várias opções terapêuticas?**  Uma publicação de qualidade indica de forma clara a opção de escolha quanto ao tratamento de acordo com as circunstâncias particulares do doente e as suas preferências. |
| 15 | **A publicação fornece informação para uma decisão clínica partilhada?**  Uma publicação de qualidade fornece informação relevante para a discussão com profissionais de saúde sobre a melhor estratégia terapêutica a adotar. |

**Tabela Suplementar 3**. Reprodutibilidade intra- e interobservador na avaliação dos vídeos.

|  | **Inter-observador** | **Intra-observador (I.F.)** | **Intra-observador (D.M.)** |
| --- | --- | --- | --- |
| Fonte/origem | 0,65**  (0,44-0,86) | 0,85**  (0,81-0,89) | 0,75**  (0,59-0,89) |
| Tema | 0,63**  (0,39-0,87) | 0,72**  (0,50-0,94) | 0,75**  (0,56-0,94) |
| Público-alvo | 0,67**  (0,40-0,94) | 0,76**  (0,46-1,00) | 0,62*  (0,22-0,89) |
| Tipo (musical, animação, etc.) | 0,78**  (0,36-1,00) | 0,63**  (0,41-0,85) | 0,79**  (0,61-1,00) |
| Erros clínico-científicos | 0,84**(0,62-1,00) | 0,92**  (0,76-1,00) | 0,92**  (0,78-1,00) |
| HONCode | 0,73**  (0,32-0,89) | 0,84**  (0,68-0,95) | 0,83**  (0,69-0,89) |
| DISCERN | 0,74**  (0,43-0,89) | 0,91**  (0,82-0,99) | 0,75**  (0,38-0,98) |

** p<0,001

* p<0,05-0,001

Concordância para fonte, tema, público-alvo, tipo e imprecisões avaliados com recurso a estatística kappa de Cohen. Concordância para HONCode e DISCERN avaliada com coeficiente de correlação intraclasse. Concordância excelente quando >0,74, boa quando = 0,60 – 0,74, razoável quando = 0,40 – 0,59, fraca quando <0,40.

**Tabela Suplementar 4** – Avaliação da qualidade dos vídeos com recurso ao HONCode e DISCERN após exclusão dos vídeos com origem em experiência pessoal ou notícias (n=19).

|  | **Todos os vídeos incluídos (n=242)** | **Após exclusão dos vídeos sem fins didáticos (n=223)** |
| --- | --- | --- |
| Vídeos com imprecisões, *n (%)* | 79 (33%) | 76 (34%) |
| HONCode Score, *média ± desvio padrão* | 3,0 ± 1,1 | 3,0 ± 1,1 |
| DISCERN, *média ± desvio padrão* | 2,4±0,7 | 2,5 ± 0,7 |
| Vídeos com boa qualidade global, *n (%)* | 1 (0,4%) | 1 (0,4%) |
